# Supplementary material for: Metal coordination to bipyridyl carbynes
Source: Royal Society of Chemistry journal article supplement (doi:10.1039/c9dt04744a), 2020-01-01

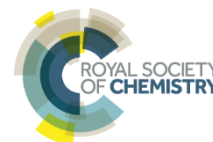

## Dalton Transactions

### SUPPORTING INFORMATION

#### Electronic Supporting Information for:

#### Metal coordination to bipyridyl carbynes

Benjamin J. Frogley<sup>a</sup> and Anthony F. Hill<sup>a†</sup>

#### Selected NMR and infrared spectra

## SUPPORTING INFORMATION

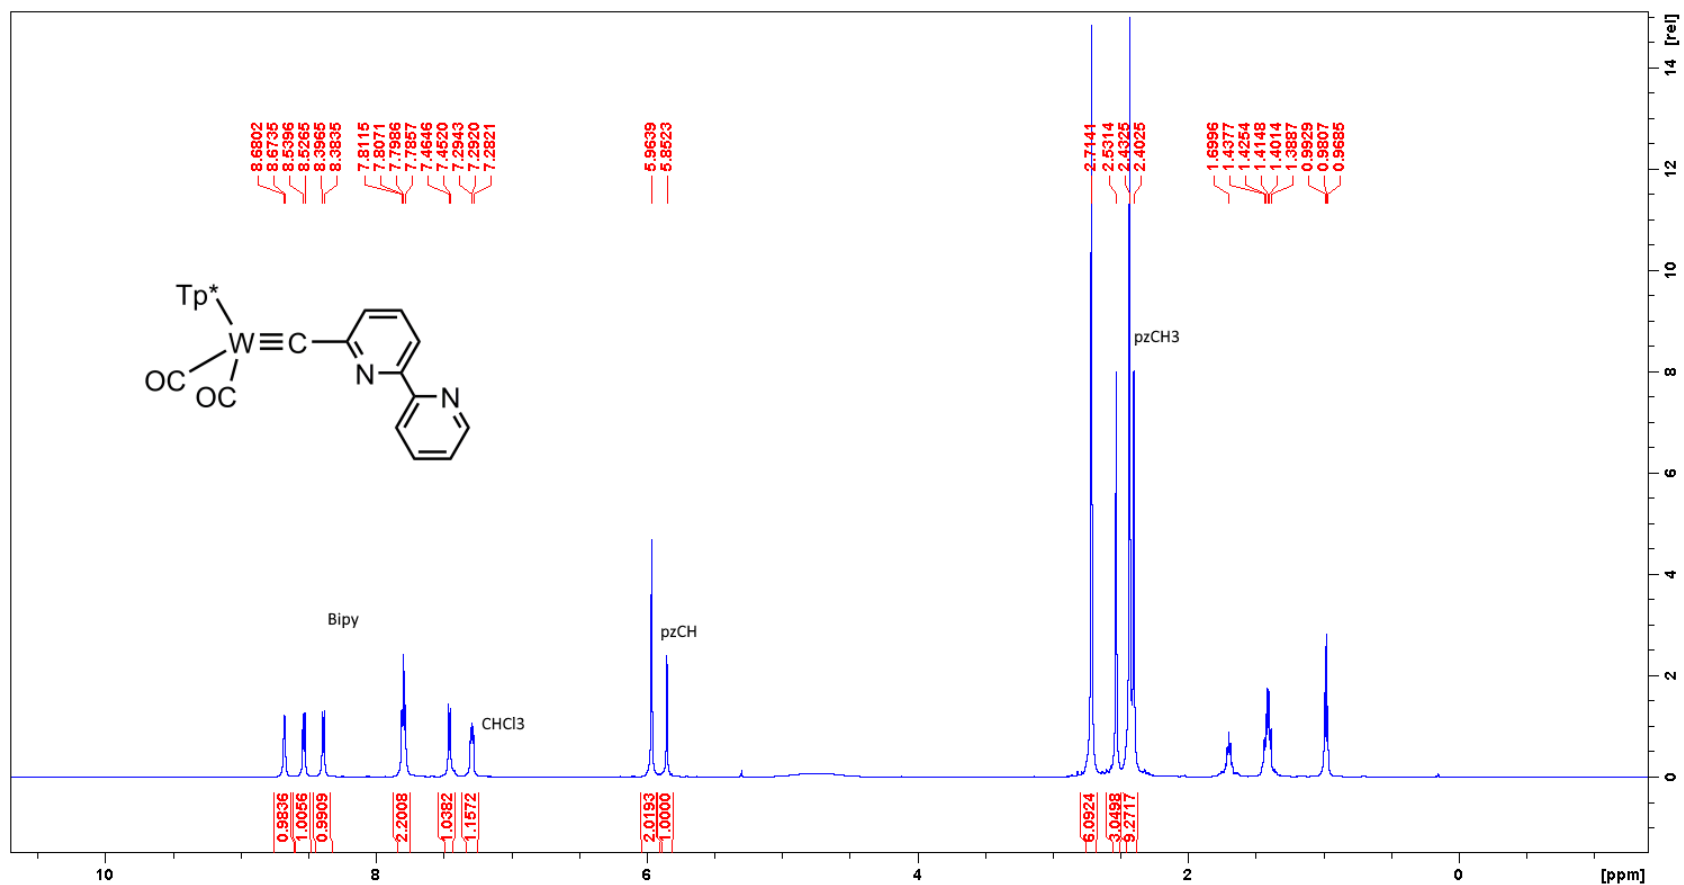

$^1\text{H}$  NMR spectrum (600 MHz,  $\text{CDCl}_3$ , 25 °C) of  $[6-((\text{Tp}^*)(\text{CO})_2\text{W}\equiv\text{C})\text{bipy}]$  (2).

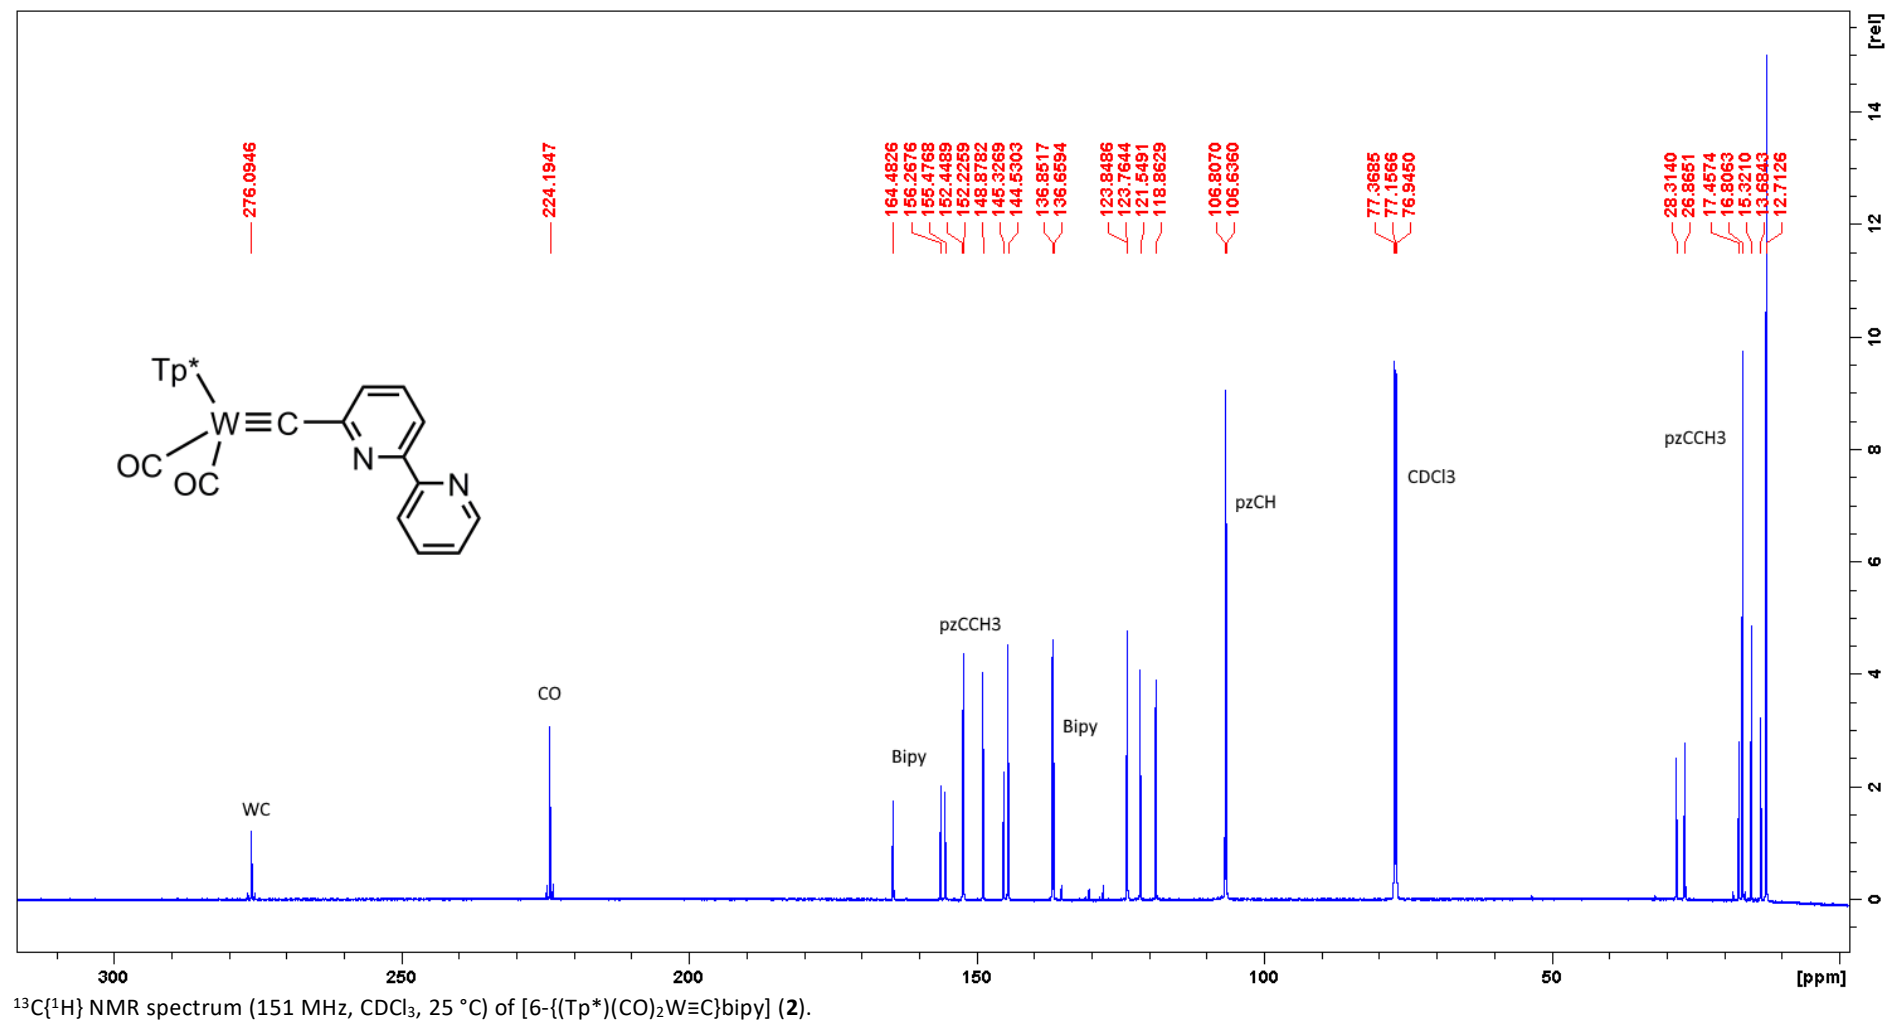

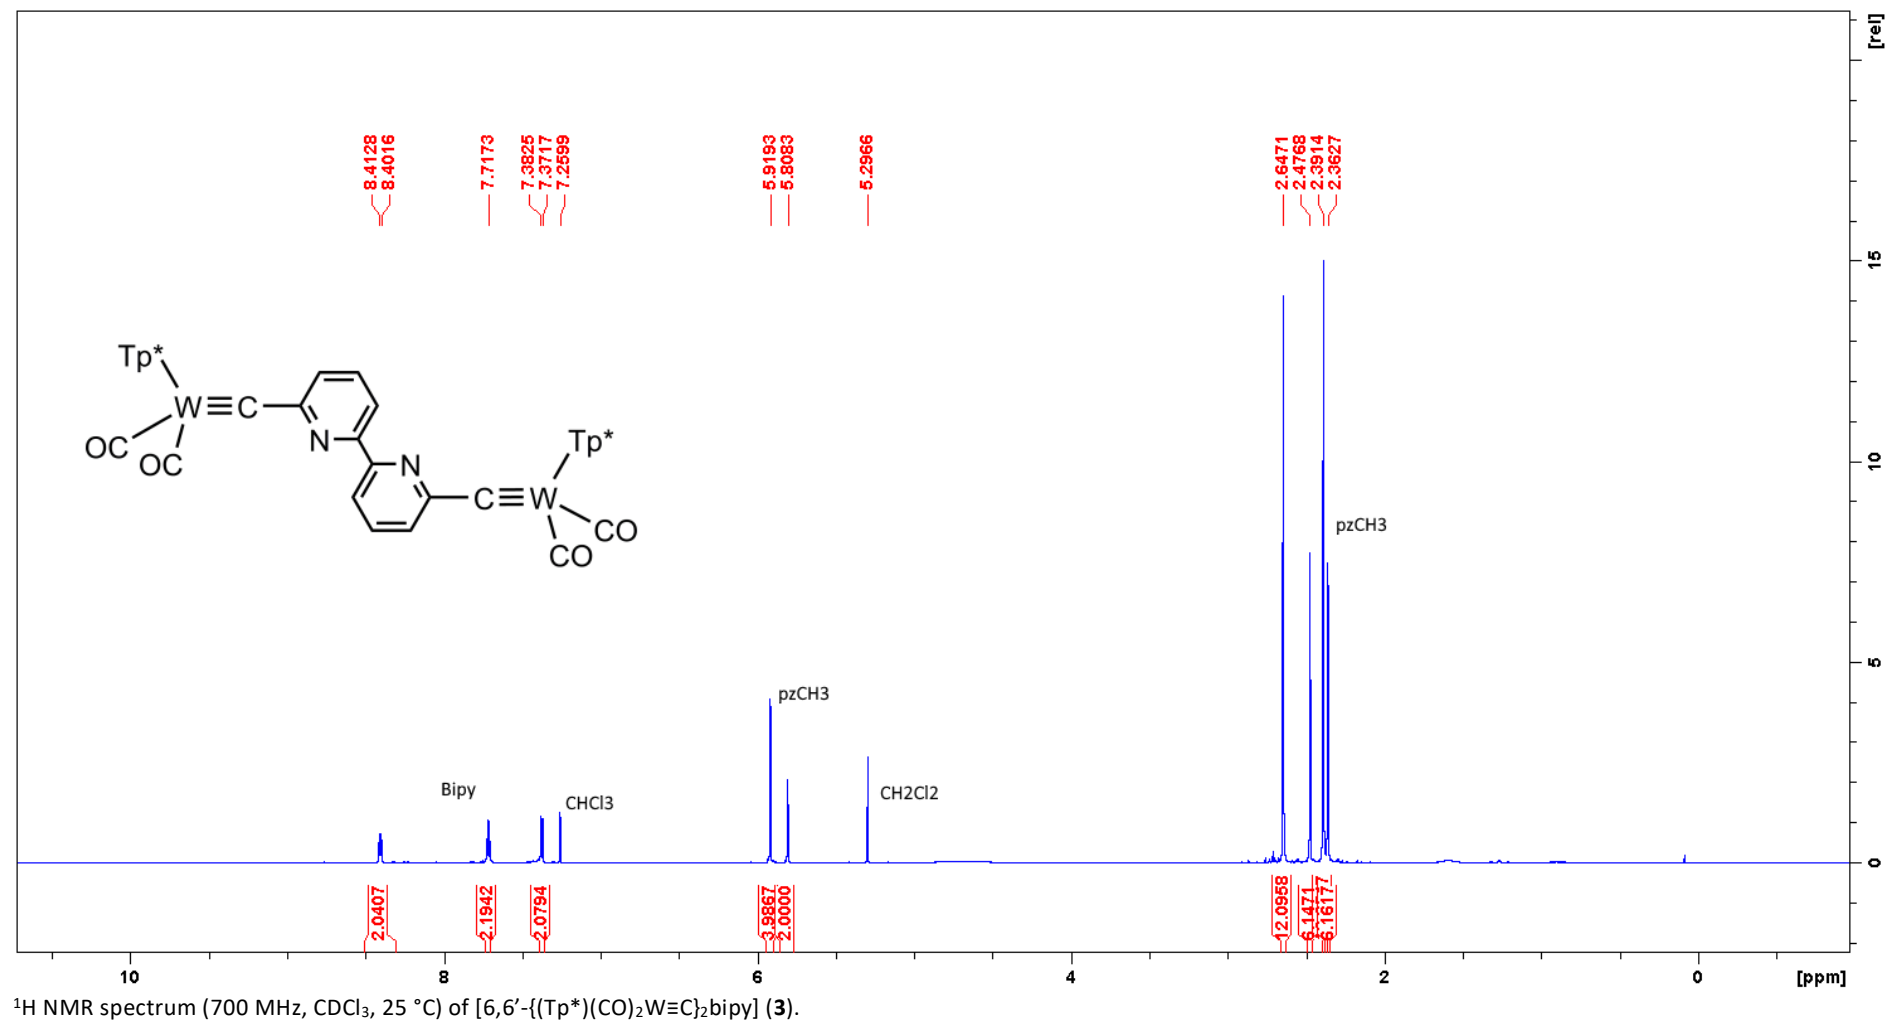

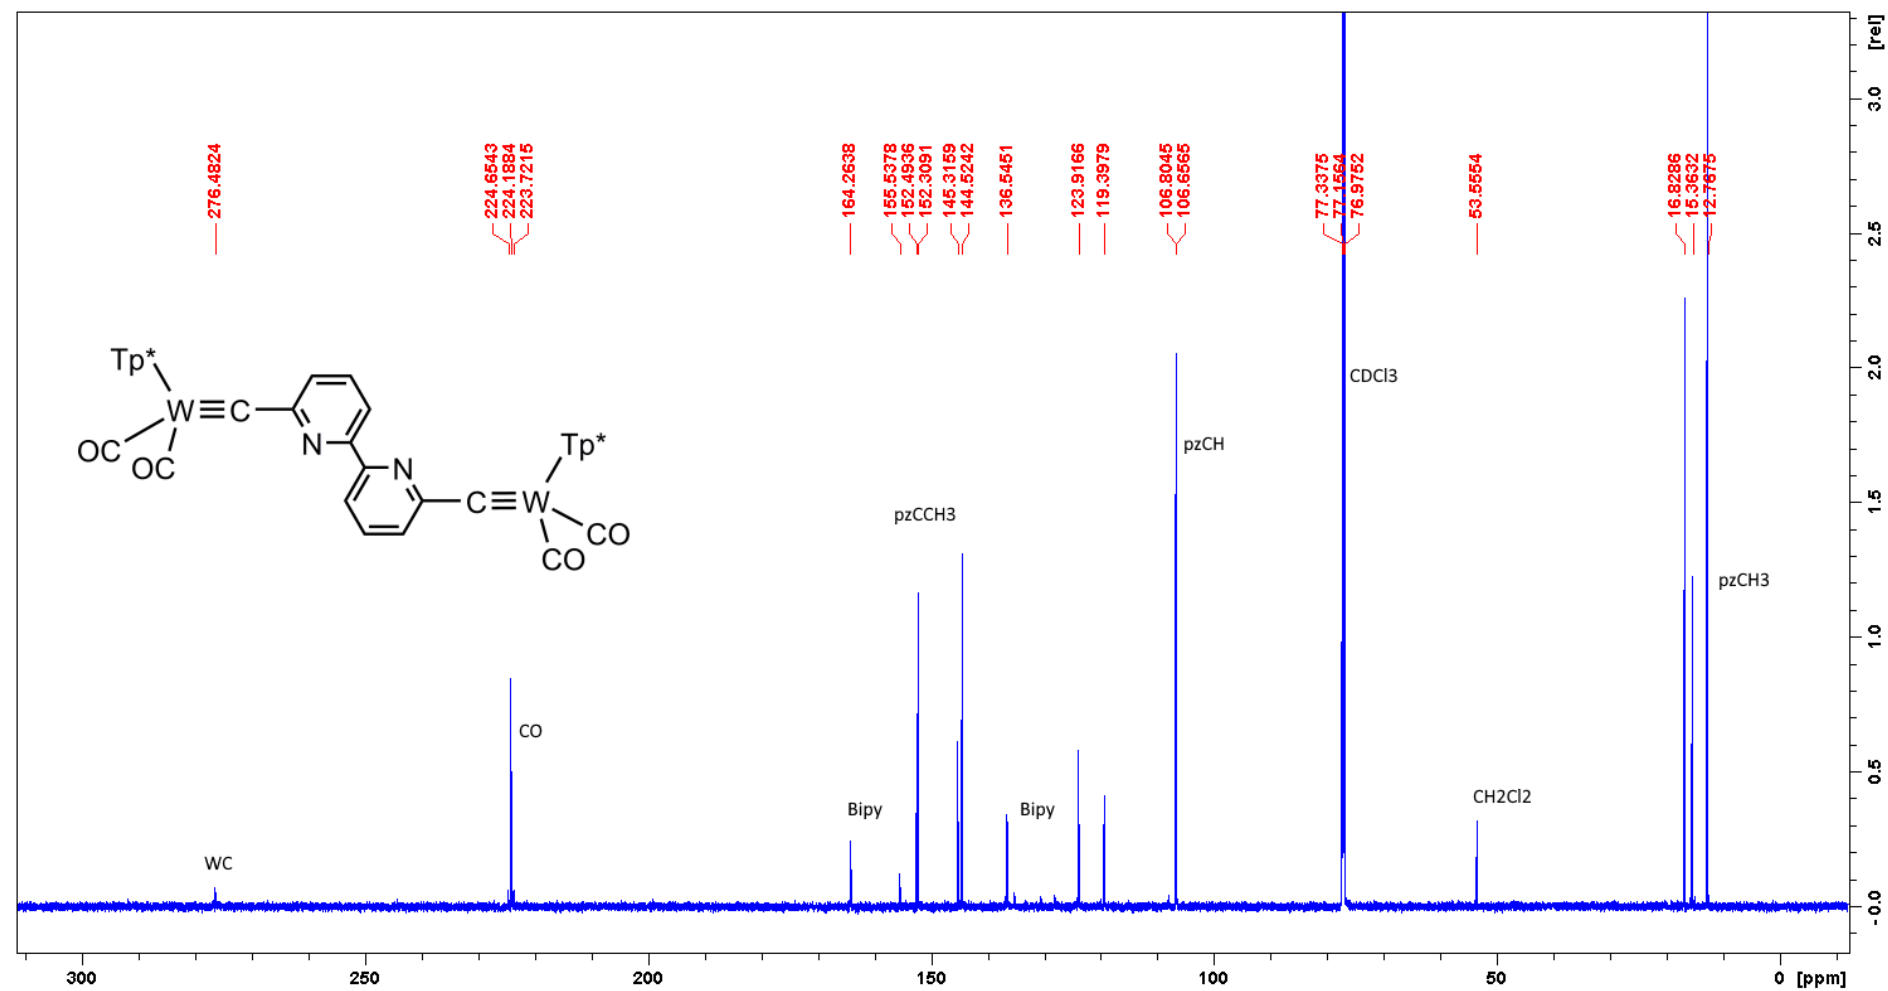

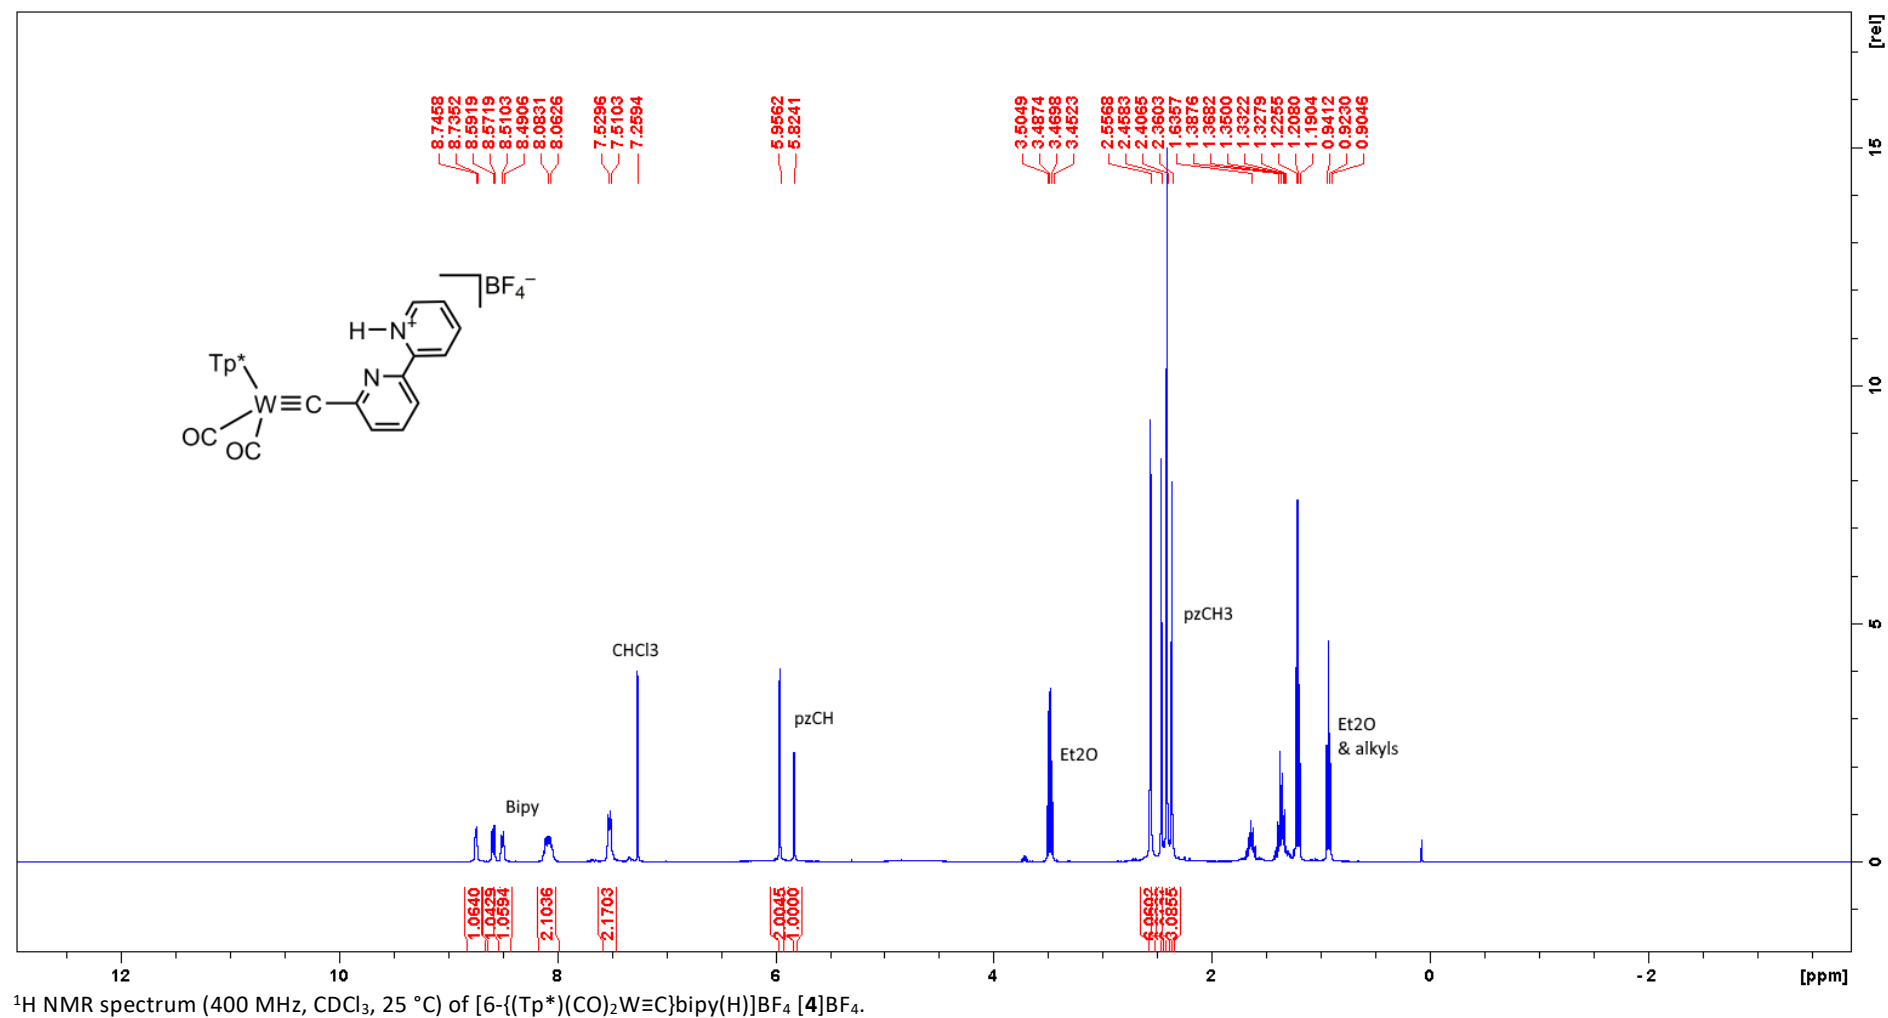

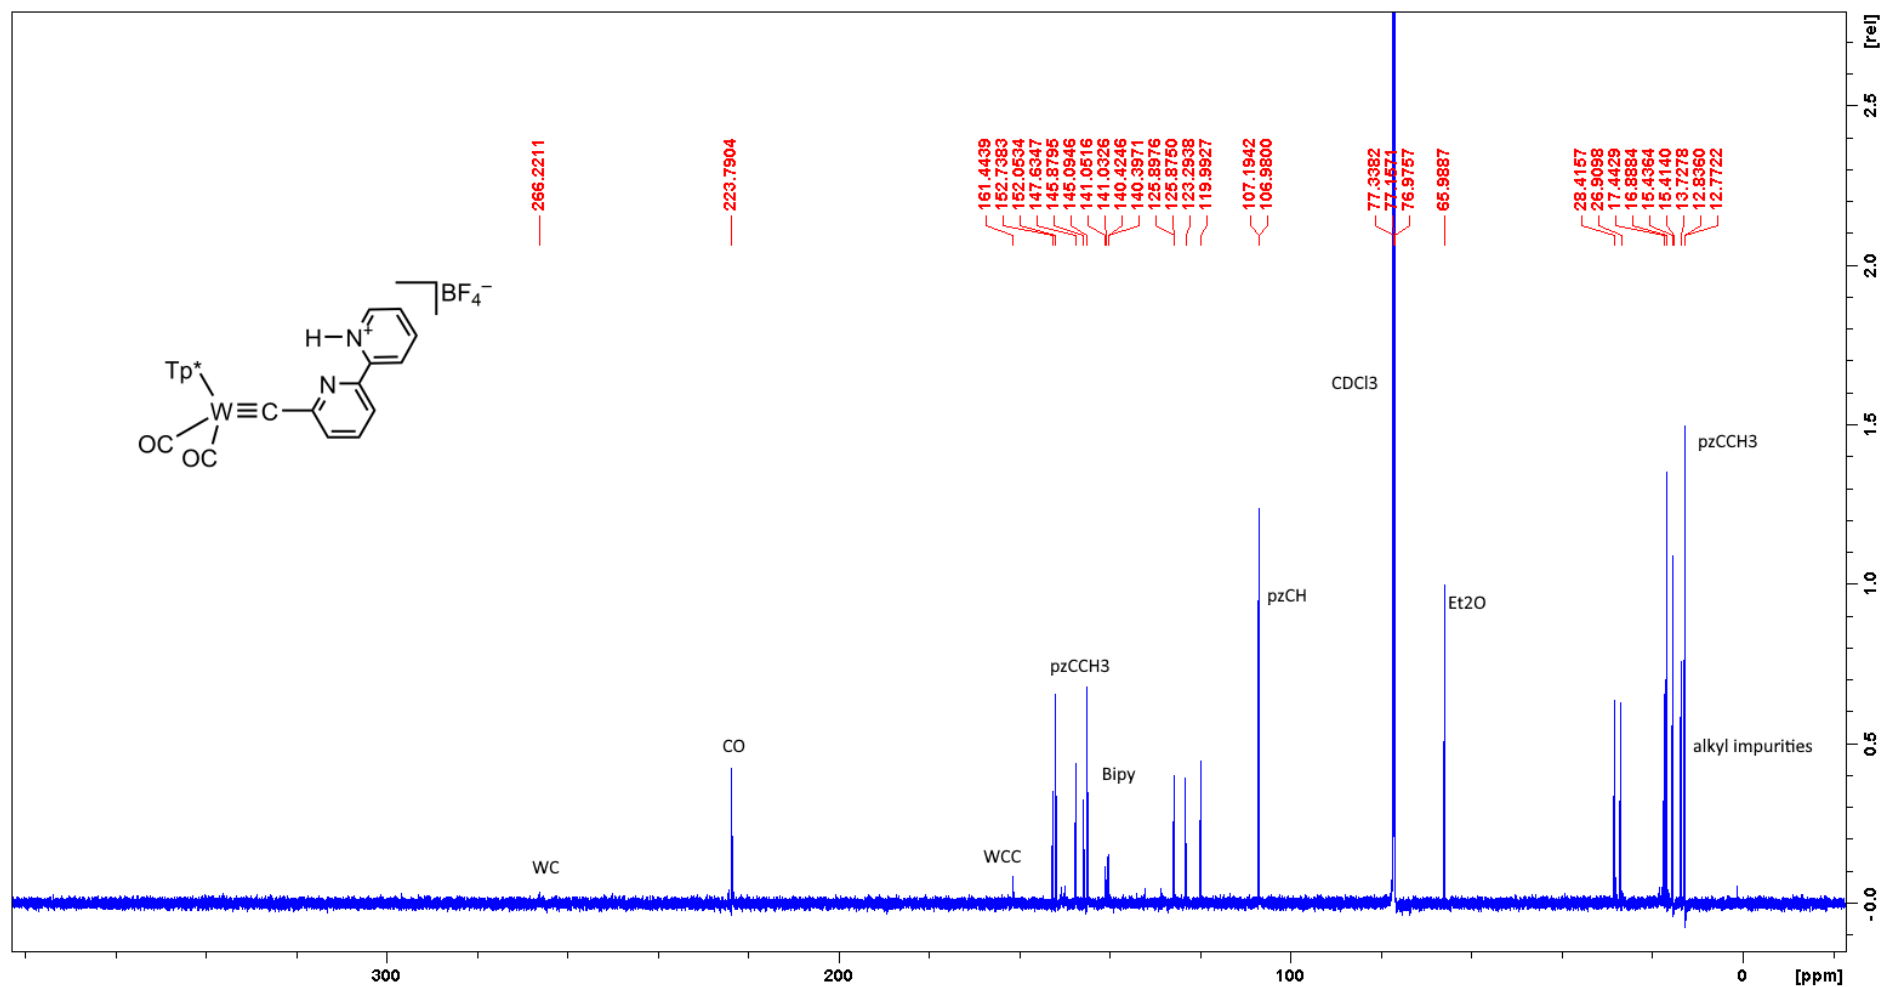

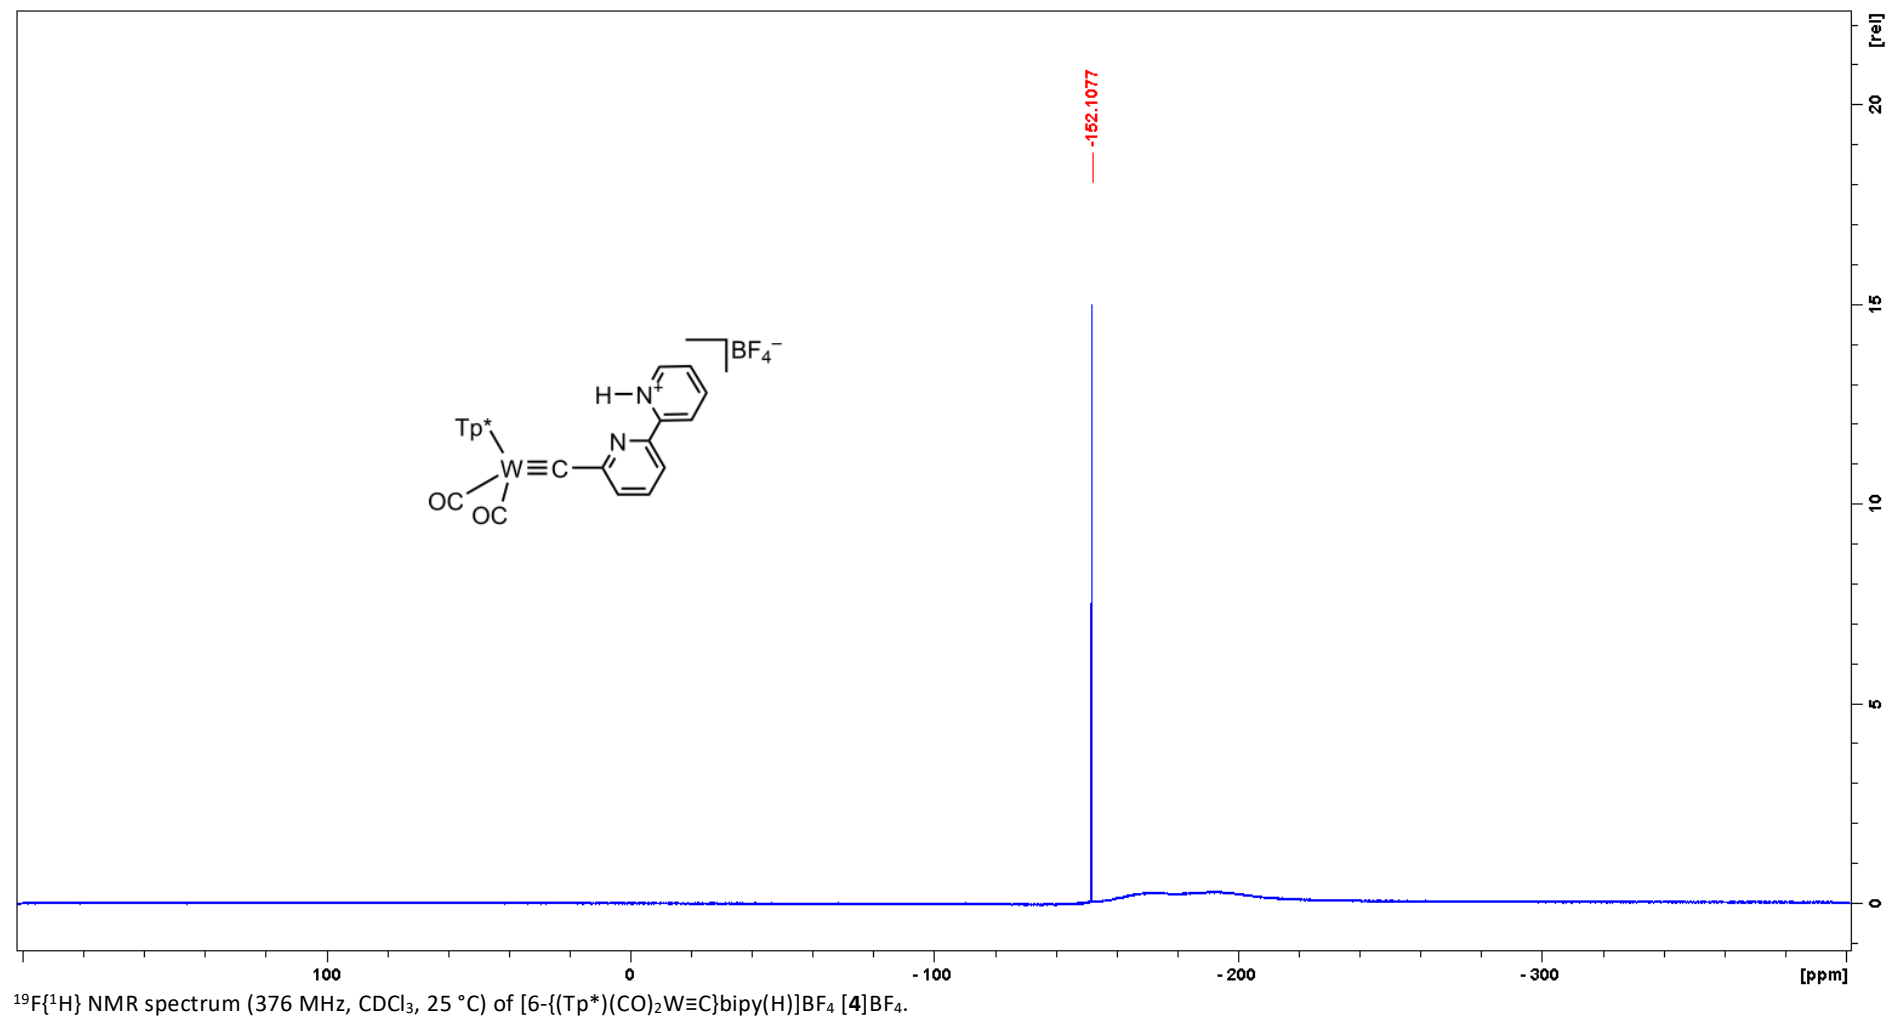



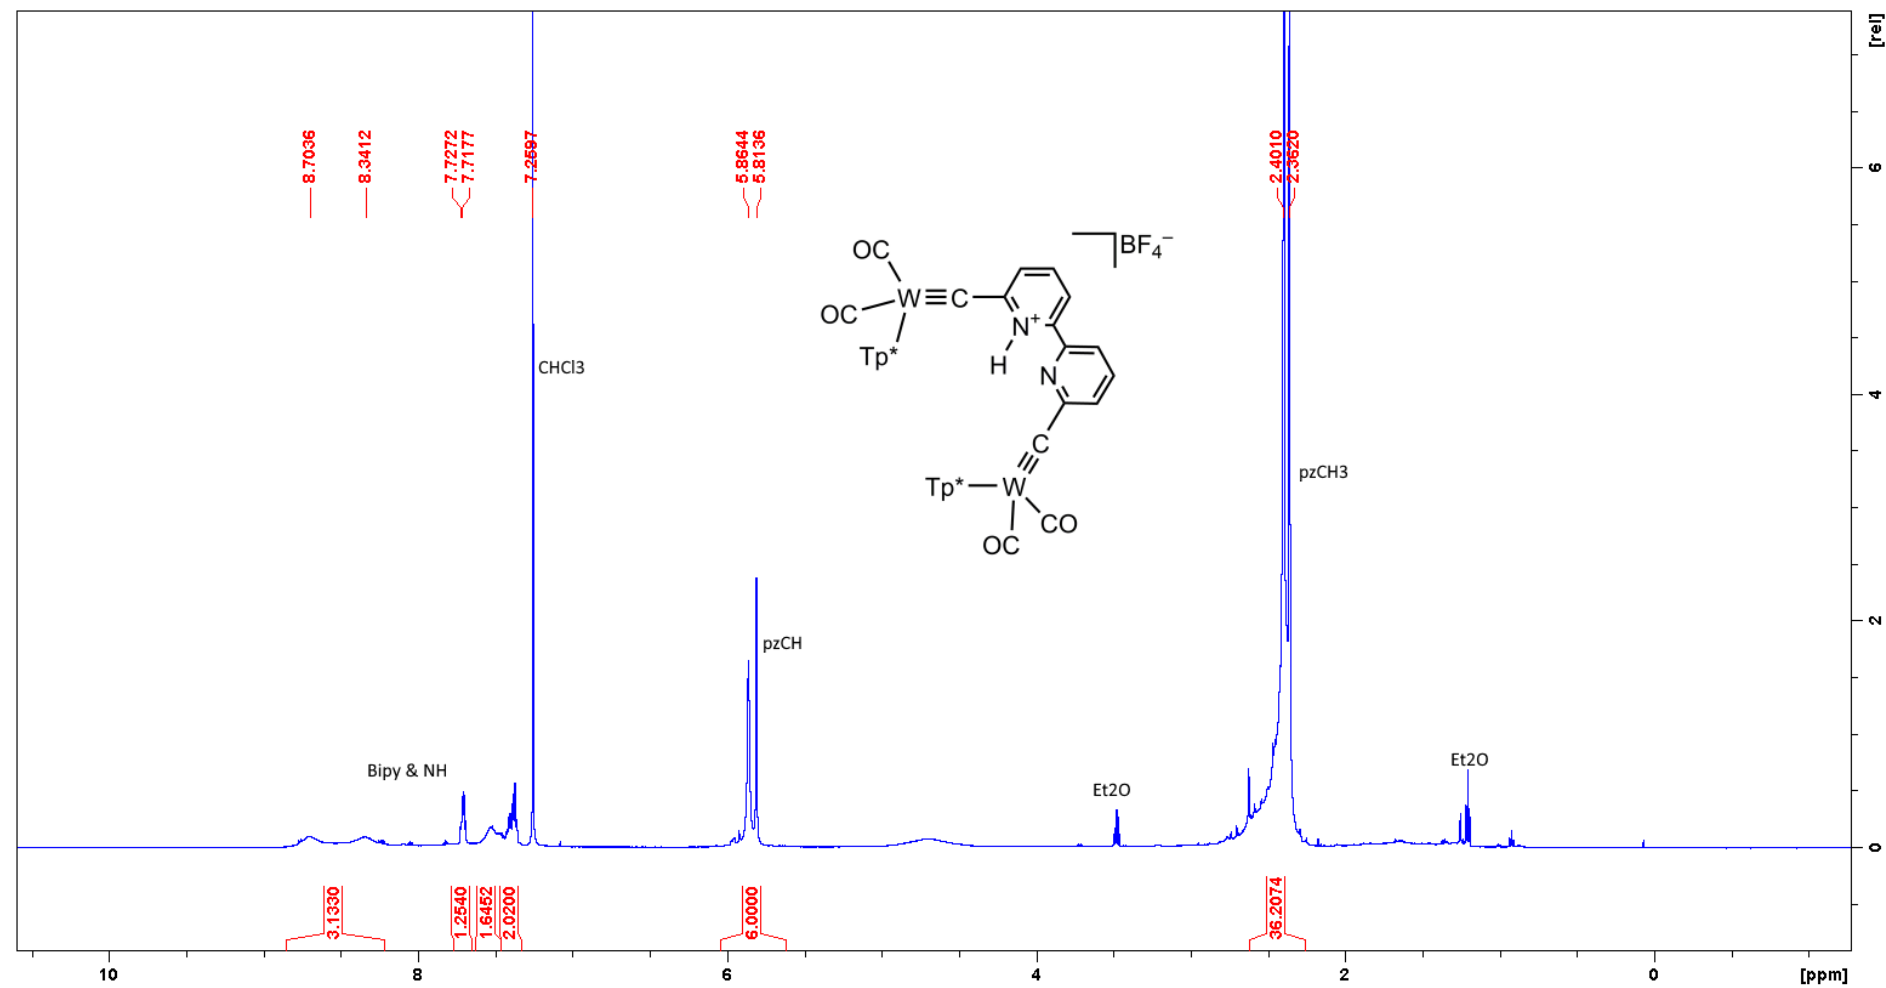

<sup>1</sup>H NMR spectrum (600 MHz, CDCl<sub>3</sub>, 25 °C) of [6,6'-((Tp\*)(CO)<sub>2</sub>W≡C)<sub>2</sub>bipy(H)]BF<sub>4</sub> [5]BF<sub>4</sub>.

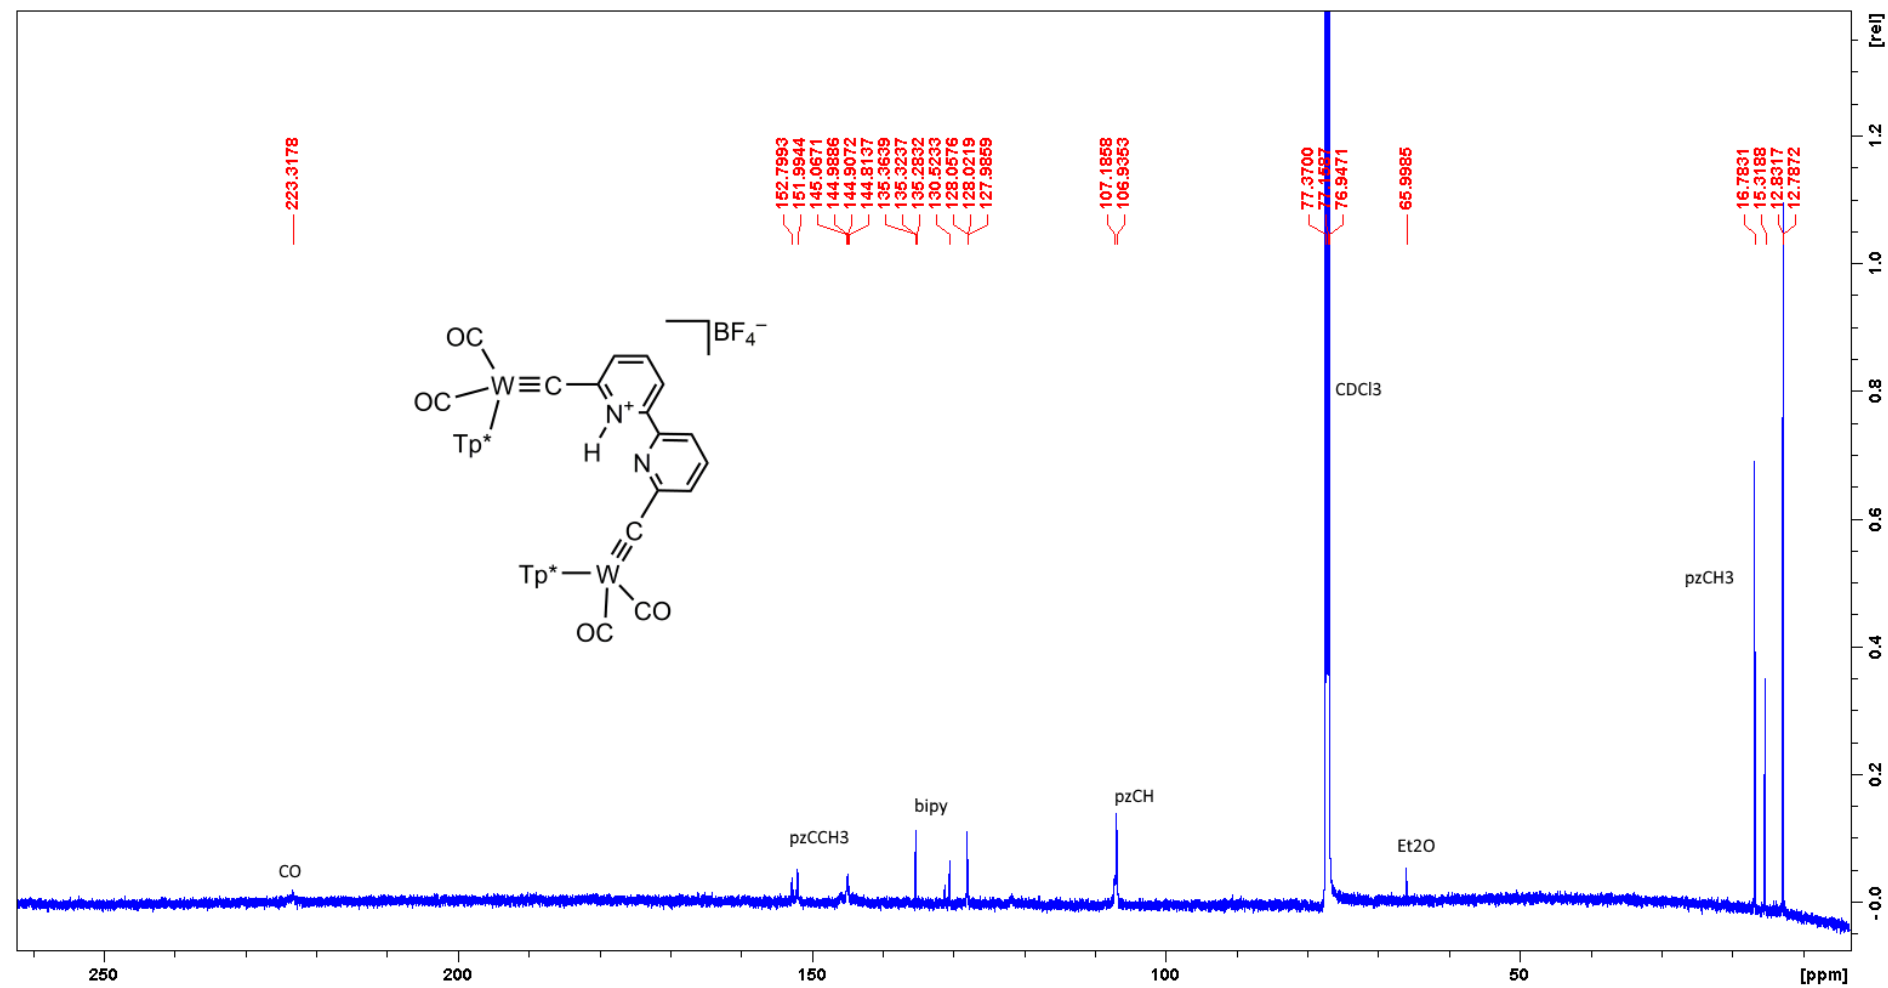

$^{13}\text{C}\{^1\text{H}\}$  NMR spectrum (151 MHz,  $\text{CDCl}_3$ , 25 °C) of  $[6,6'-((\text{Tp}^*)(\text{CO})_2\text{W}\equiv\text{C})_2\text{bipy}(\text{H})]\text{BF}_4$  [5] $\text{BF}_4$ .

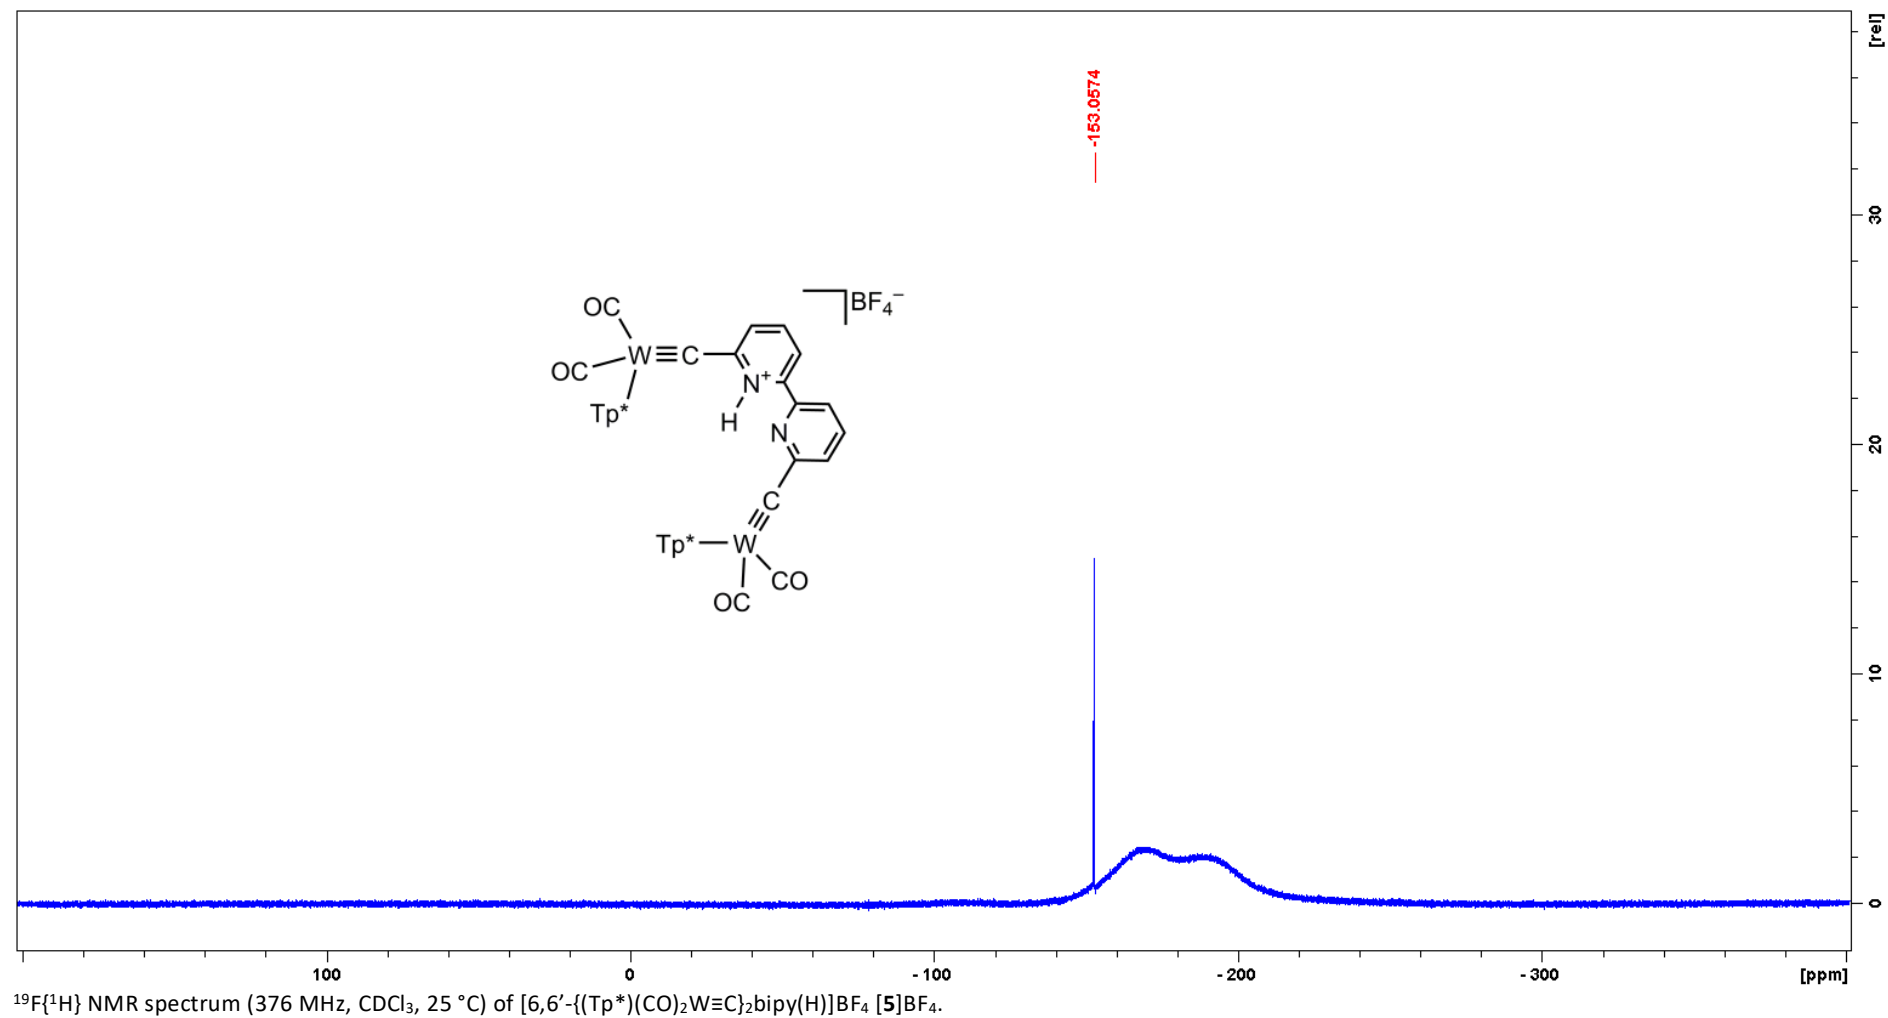

## SUPPORTING INFORMATION

## Dalton Transaction

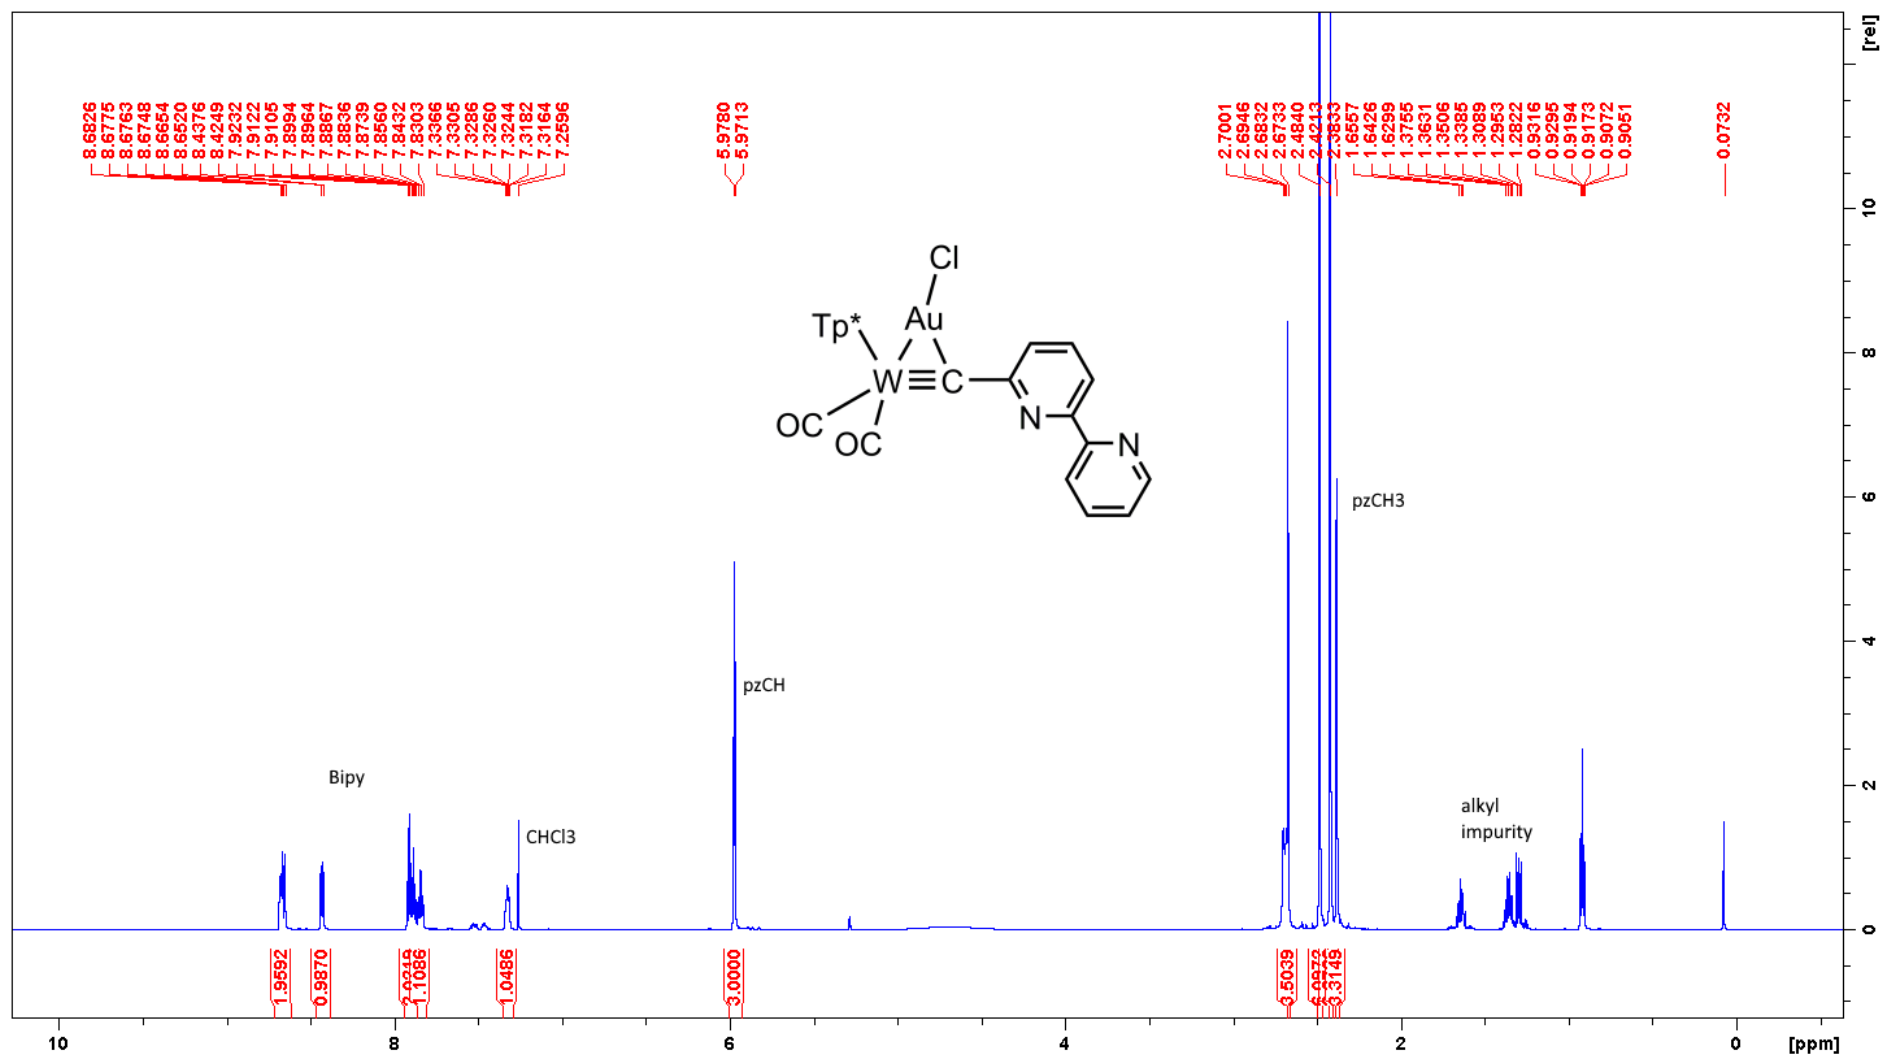

<sup>1</sup>H NMR spectrum (600 MHz, CDCl<sub>3</sub>, 25 °C) of [6-((Tp\*)(CO)<sub>2</sub>W(AuCl)(μ-C))bipy] (6).

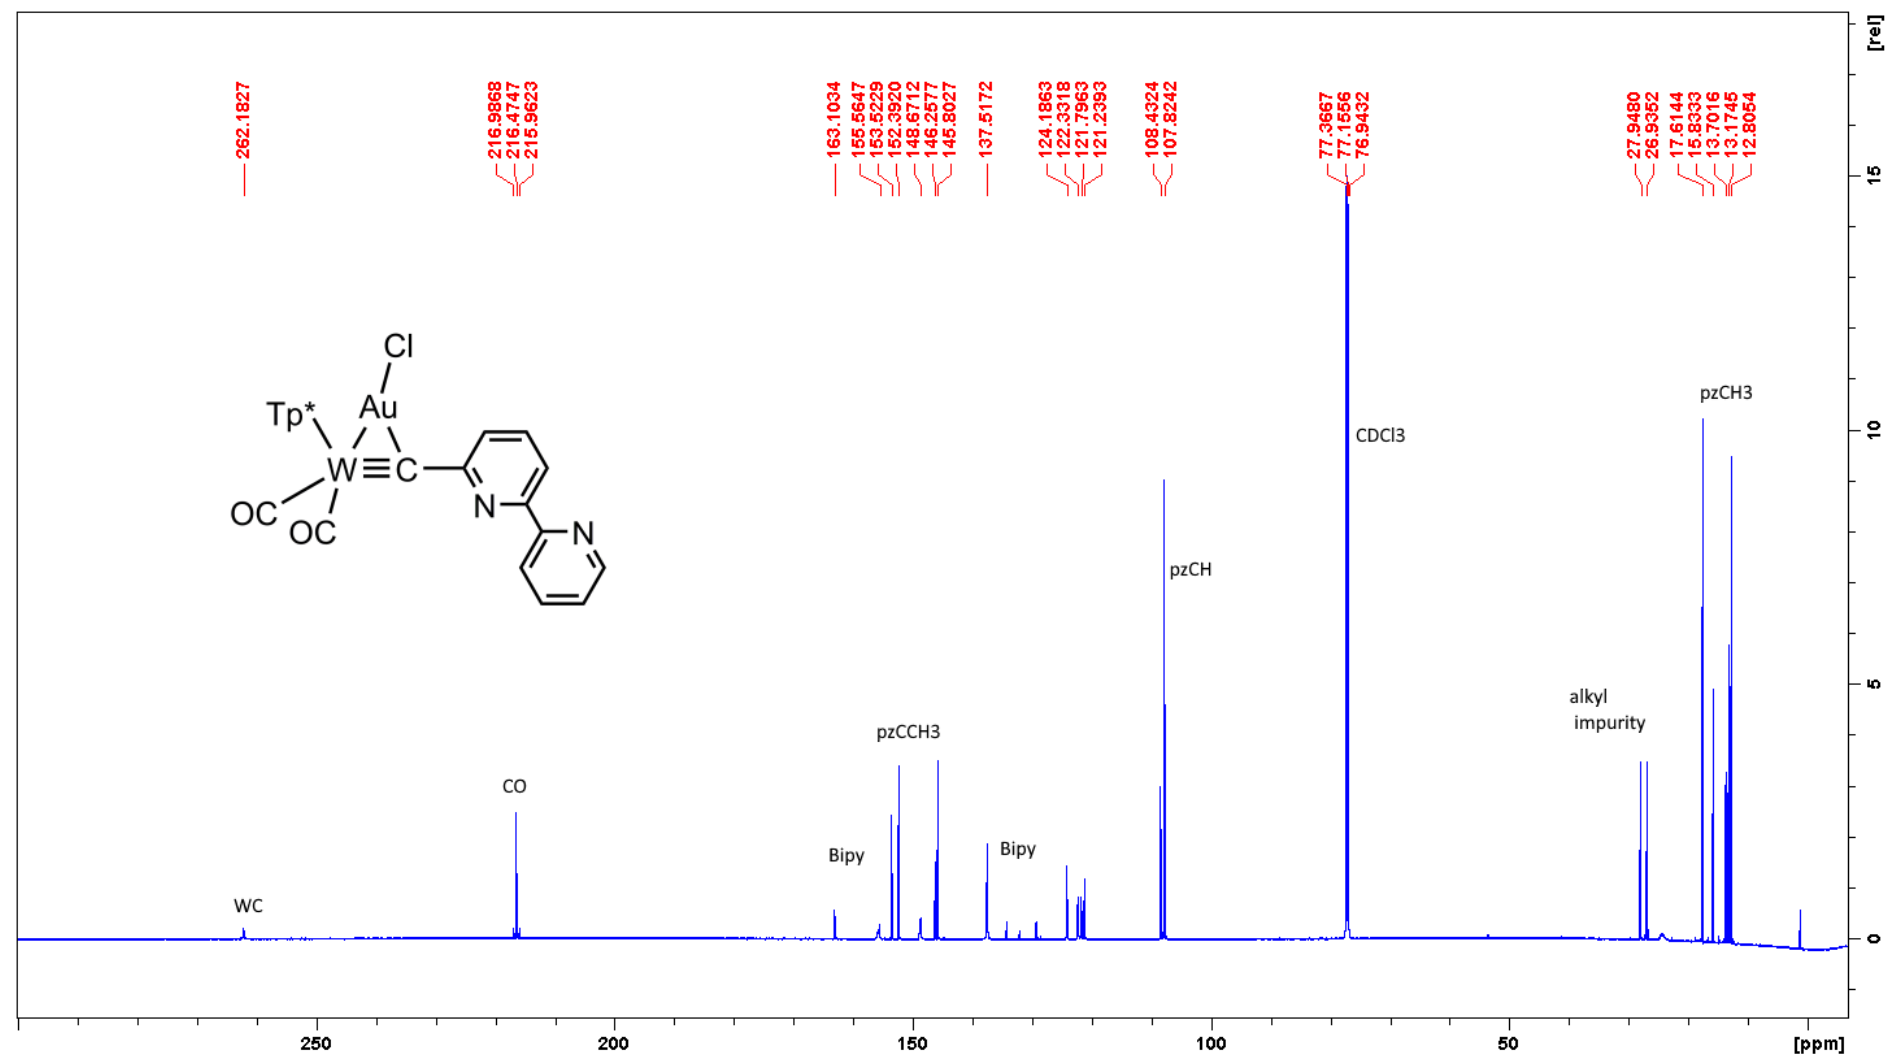

<sup>13</sup>C{<sup>1</sup>H} NMR spectrum (151 MHz, CDCl<sub>3</sub>, 25 °C) of [6-((Tp\*)(CO)<sub>2</sub>W(AuCl)(μ-C))bipy] (6).

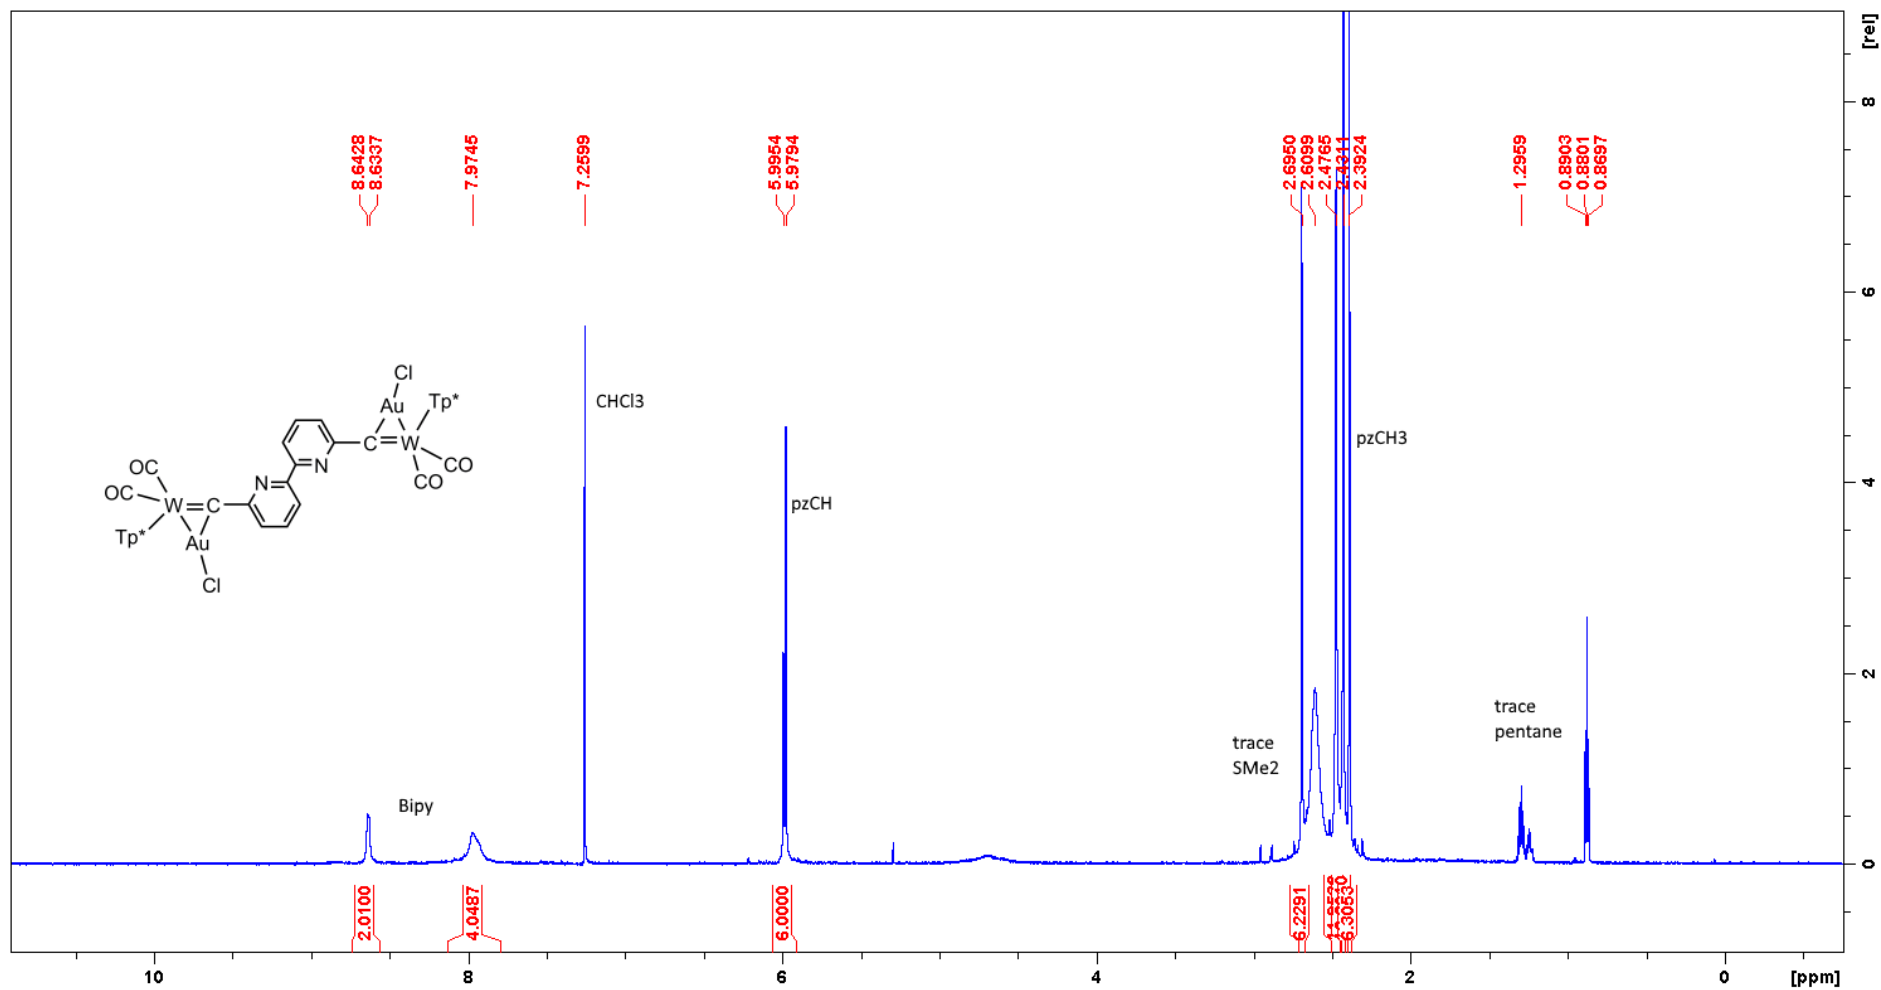

$^1\text{H}$  NMR spectrum (700 MHz,  $\text{CDCl}_3$ ,  $25^\circ\text{C}$ ) of  $[6,6'-((\text{Tp}^*)_2(\text{CO})_2\text{W}(\text{AuCl})(\mu\text{-C}))_2\text{bipy}]$  (7).

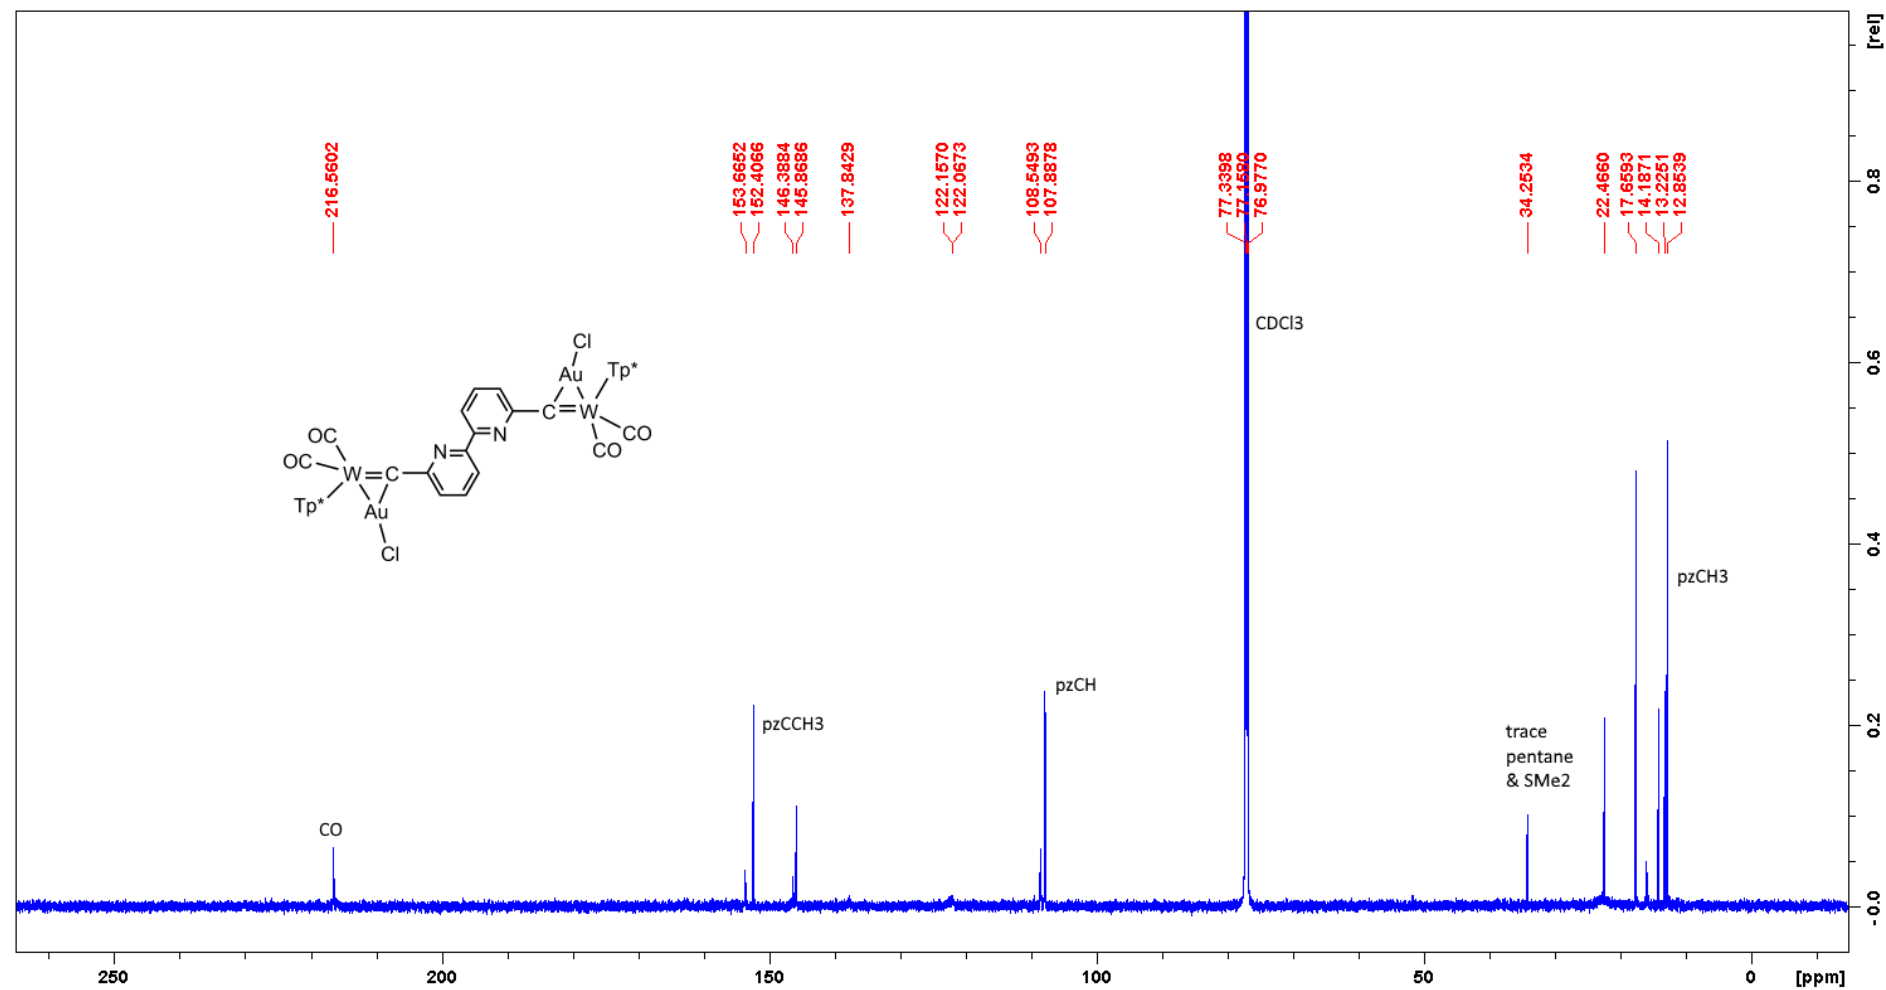

$^{13}\text{C}\{^1\text{H}\}$  NMR spectrum (176 MHz,  $\text{CDCl}_3$ , 25 °C) of  $[6,6'\text{-}(\text{Tp}^*)(\text{CO})_2\text{W}(\text{AuCl})(\mu\text{-C})_2\text{bipy}]$  (7).

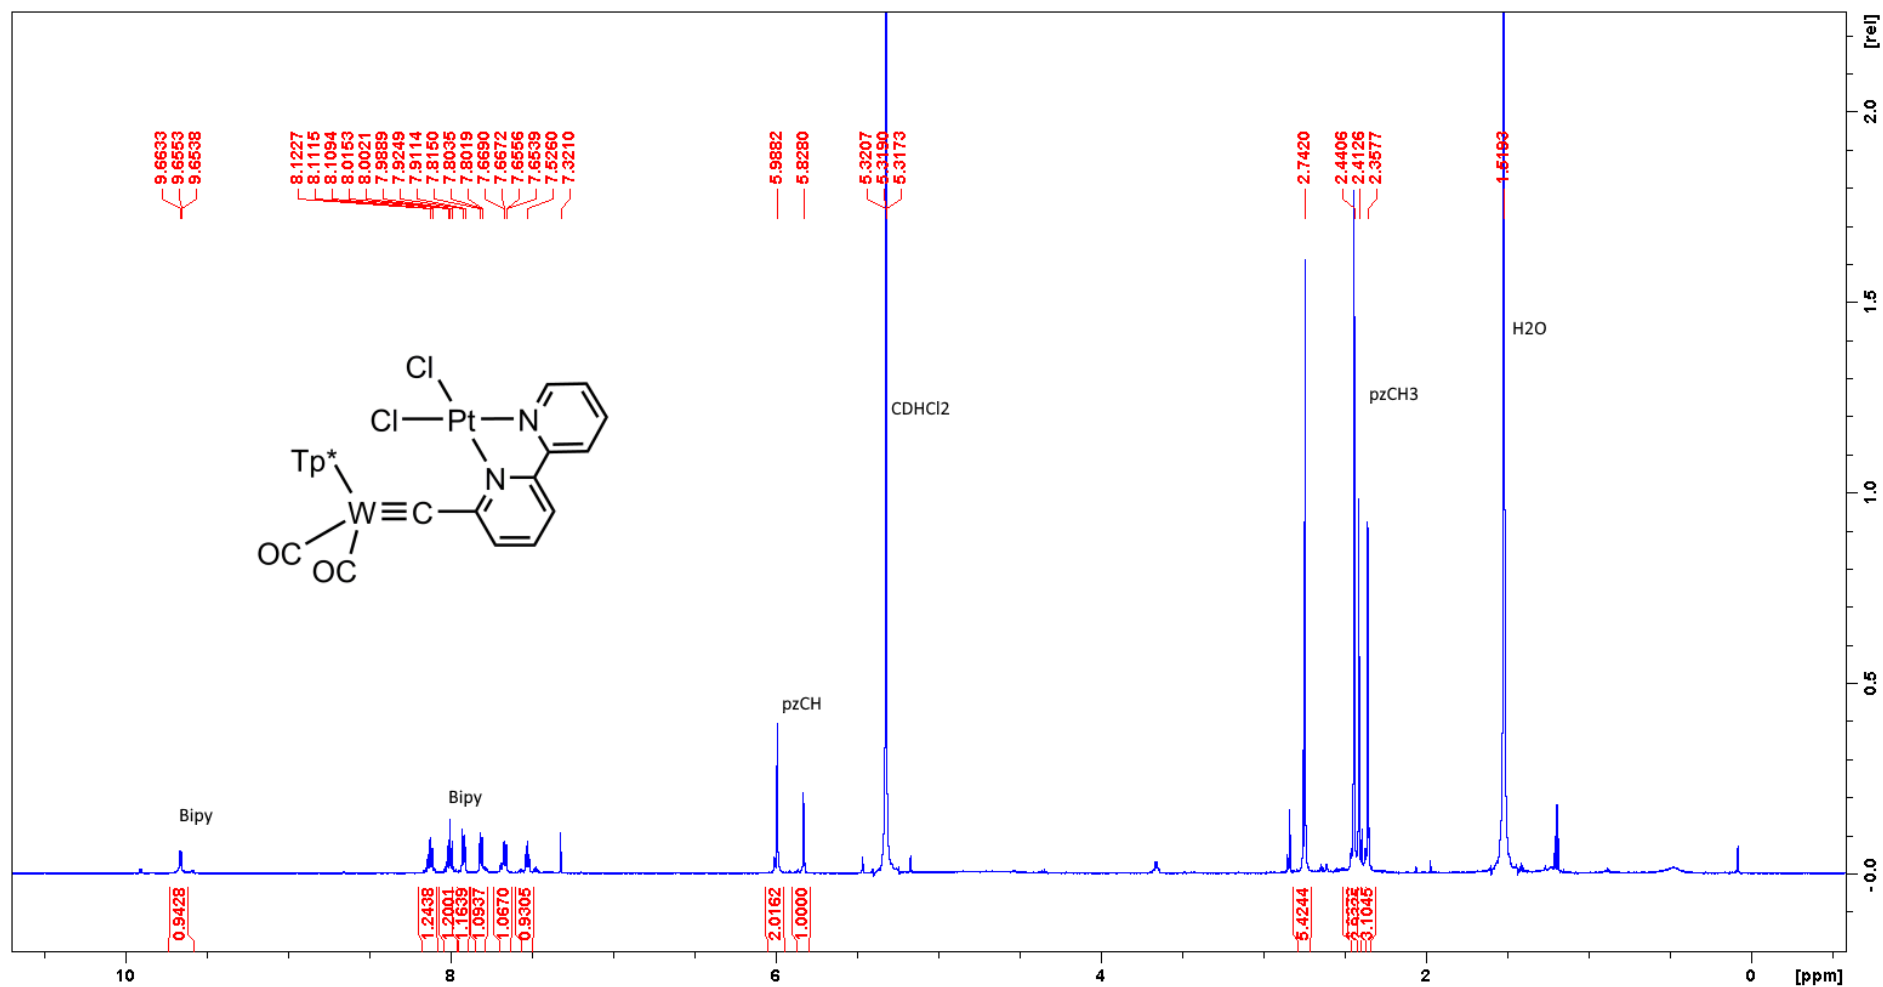

<sup>1</sup>H NMR spectrum (600 MHz, CD<sub>2</sub>Cl<sub>2</sub>, 25 °C) of [6-((Tp\*)(CO)<sub>2</sub>W≡C)bipy(PtCl<sub>2</sub>)] (9).



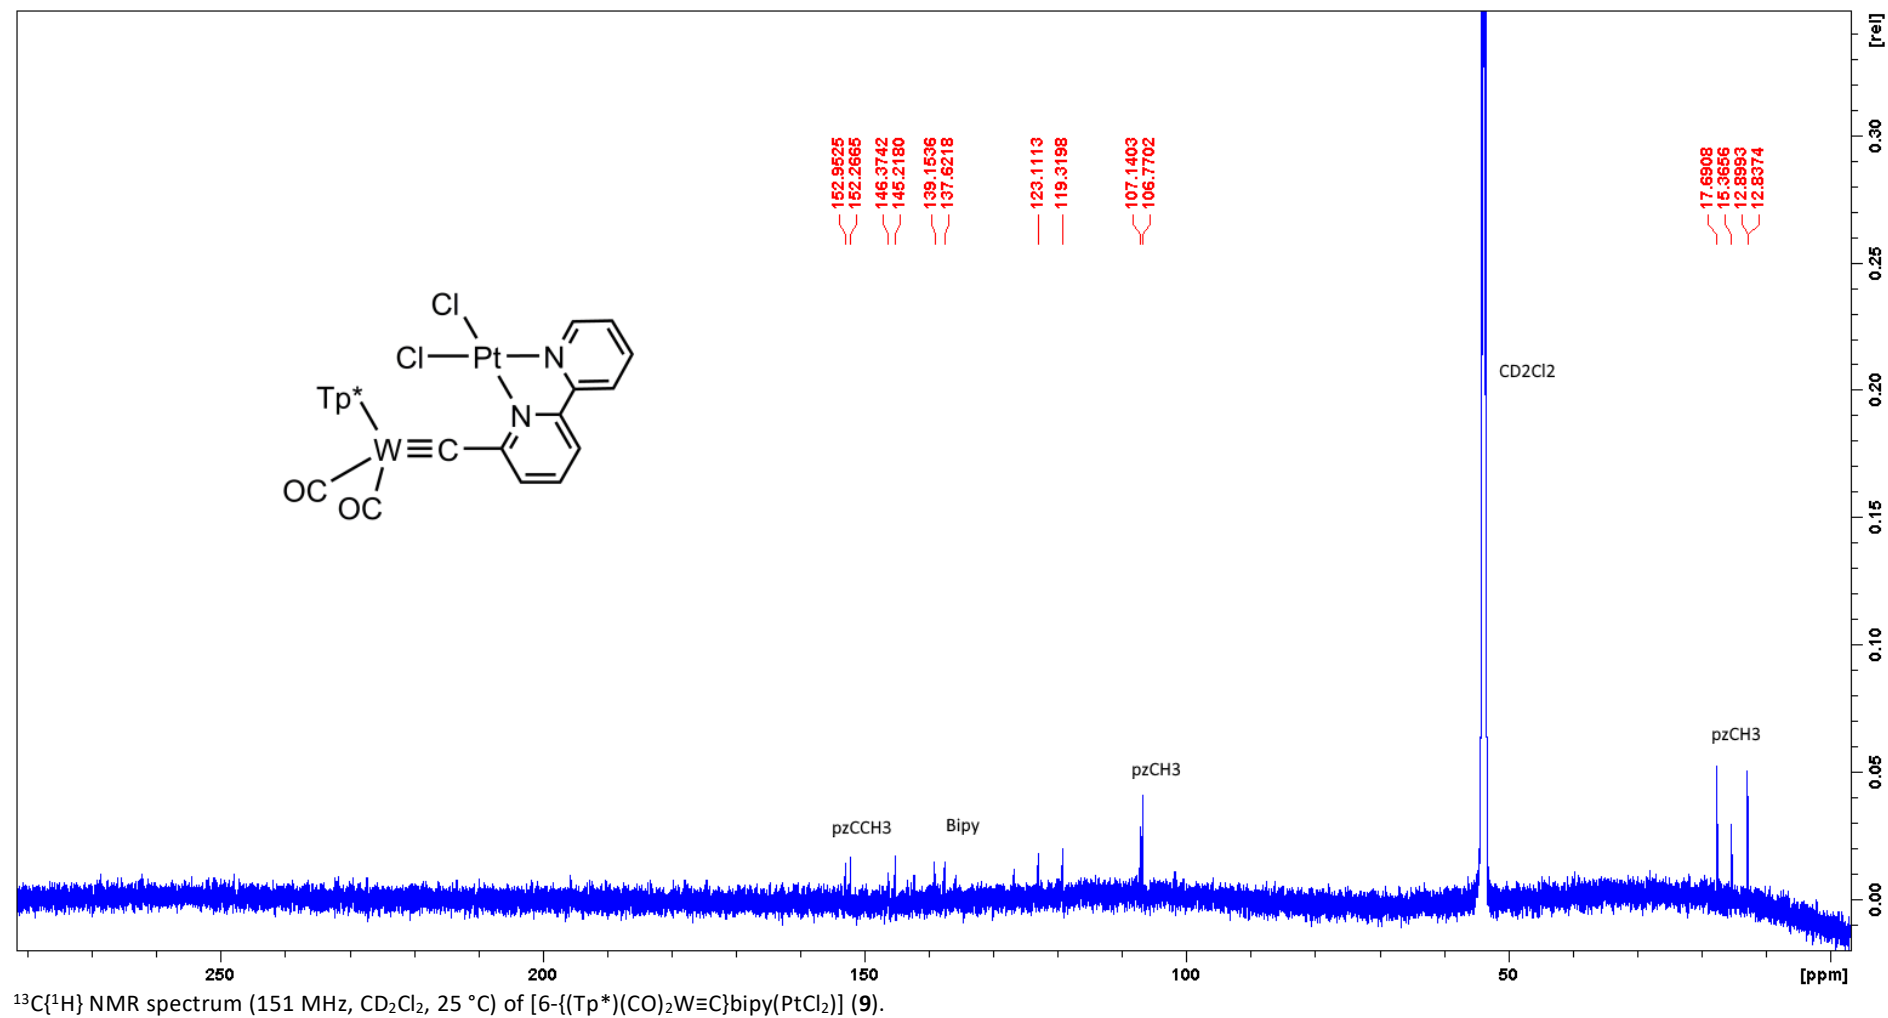

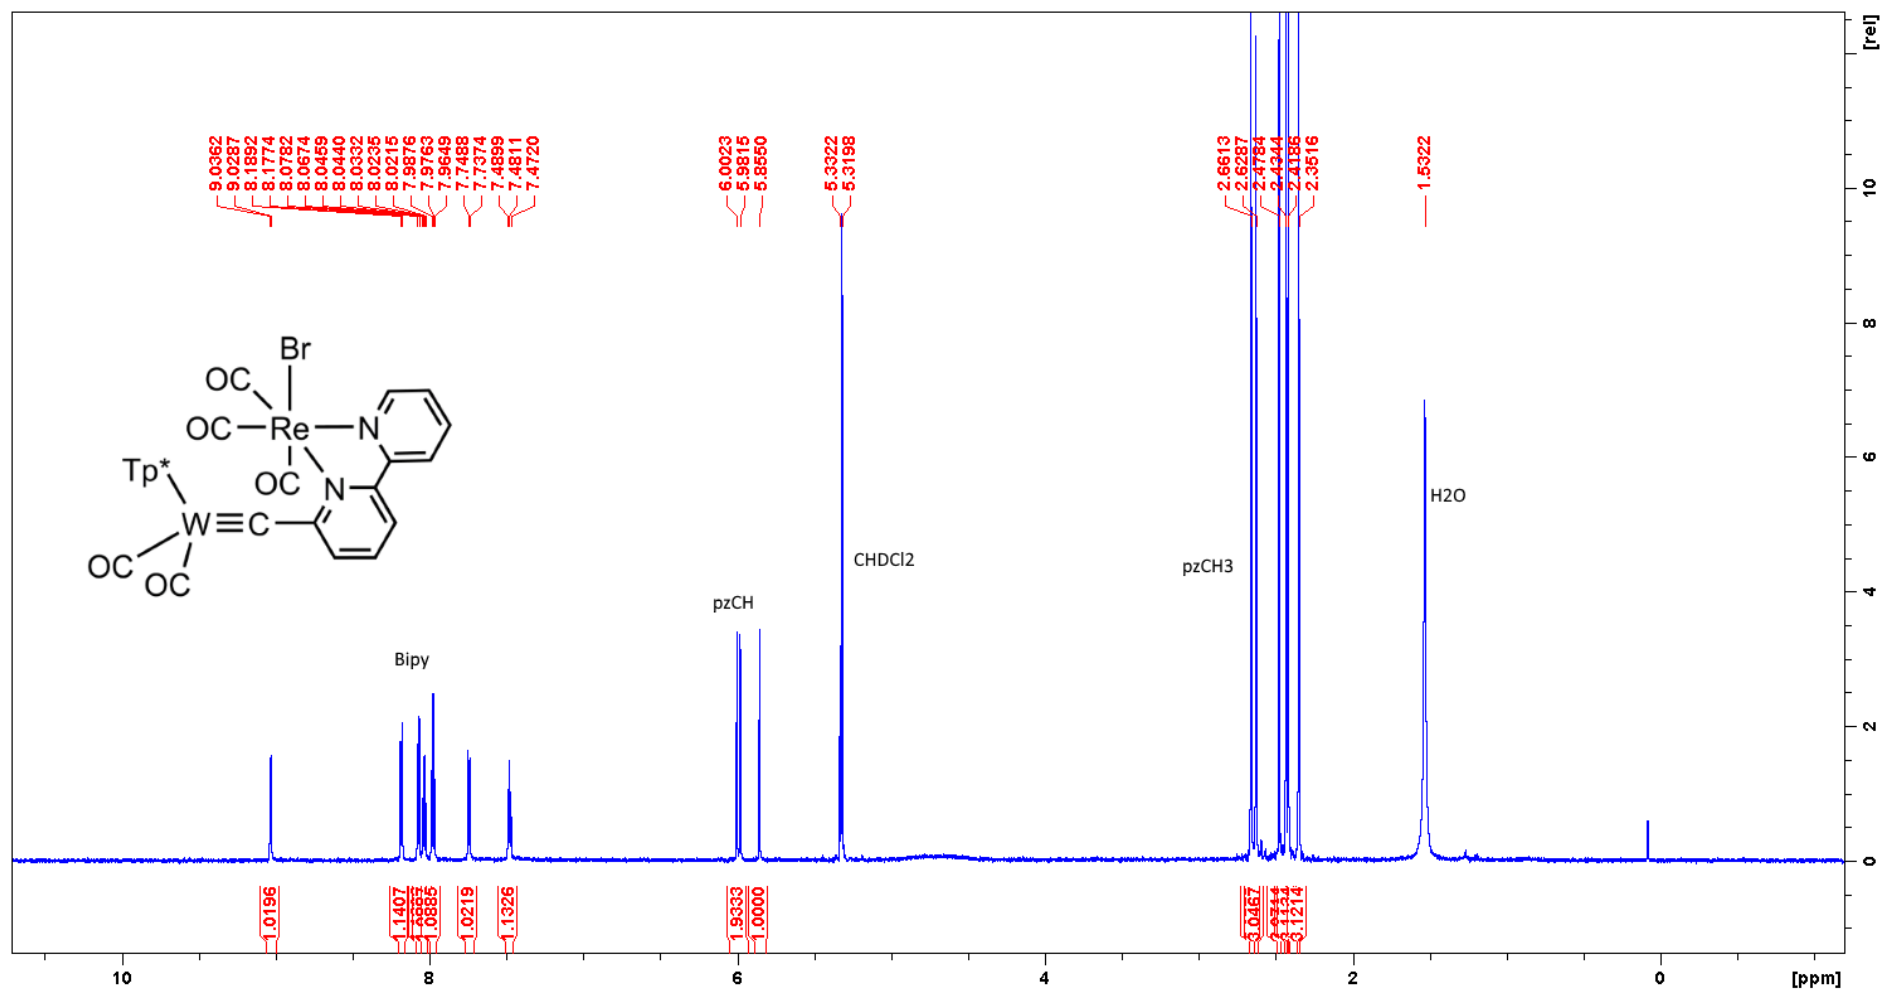

<sup>1</sup>H NMR spectrum (700 MHz, CDCl<sub>3</sub>, 25 °C) of [6-((Tp\*)<sub>2</sub>(CO)<sub>2</sub>W≡C)bipy]{ReBr(CO)<sub>3</sub>} (**10**).

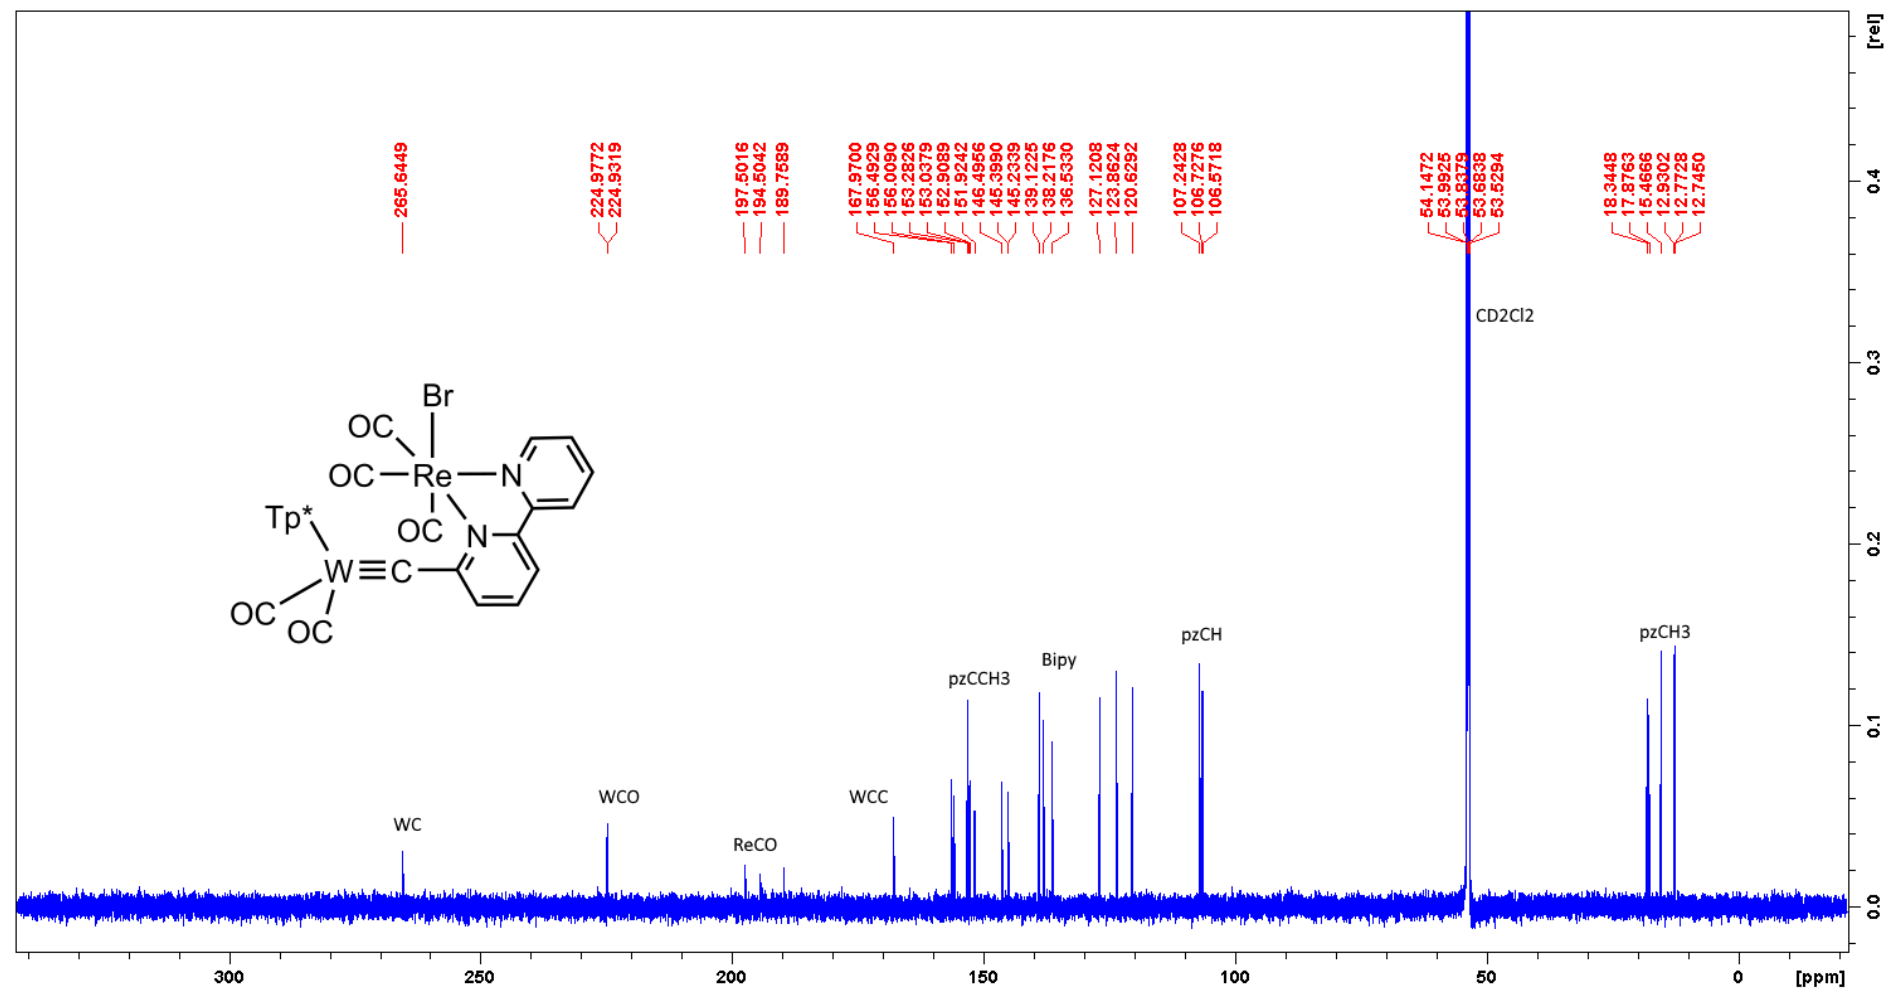

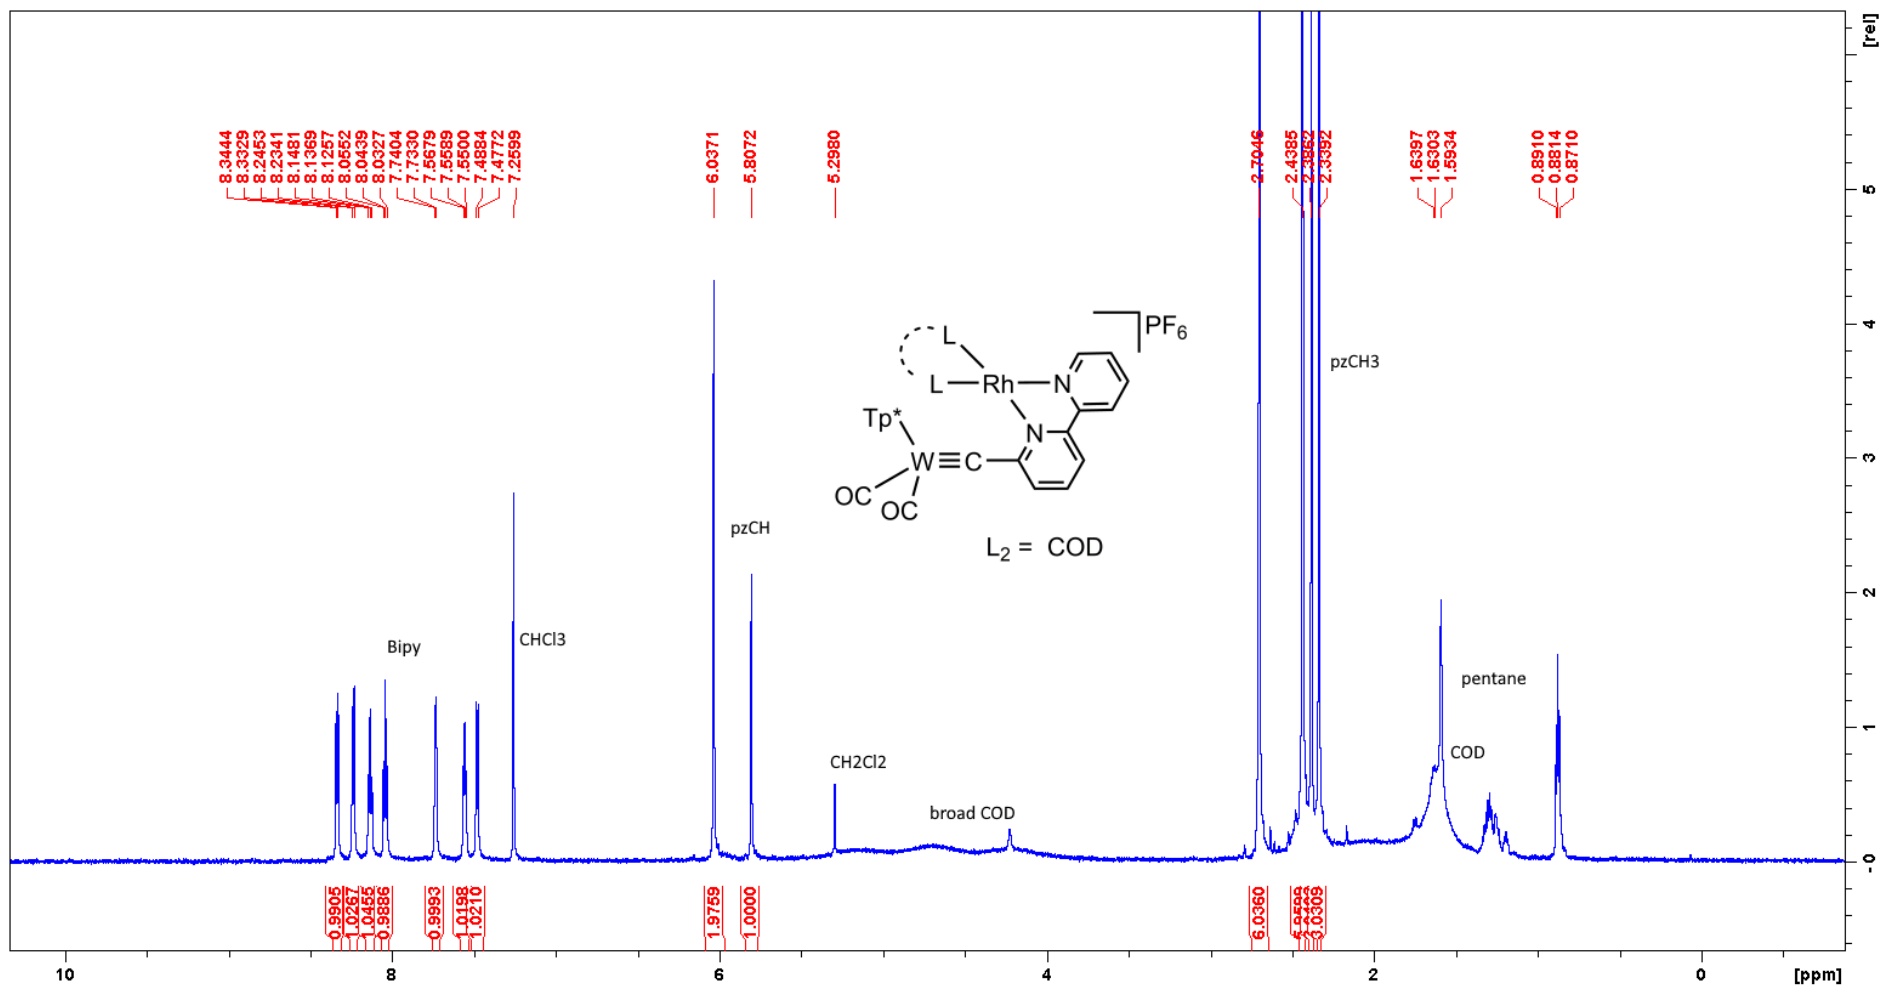

<sup>1</sup>H NMR spectrum (700 MHz, CDCl<sub>3</sub>, 25 °C) of [6-((Tp\*)(CO)<sub>2</sub>W≡C)bipy{Rh(COD)}]PF<sub>6</sub> [11]PF<sub>6</sub>.

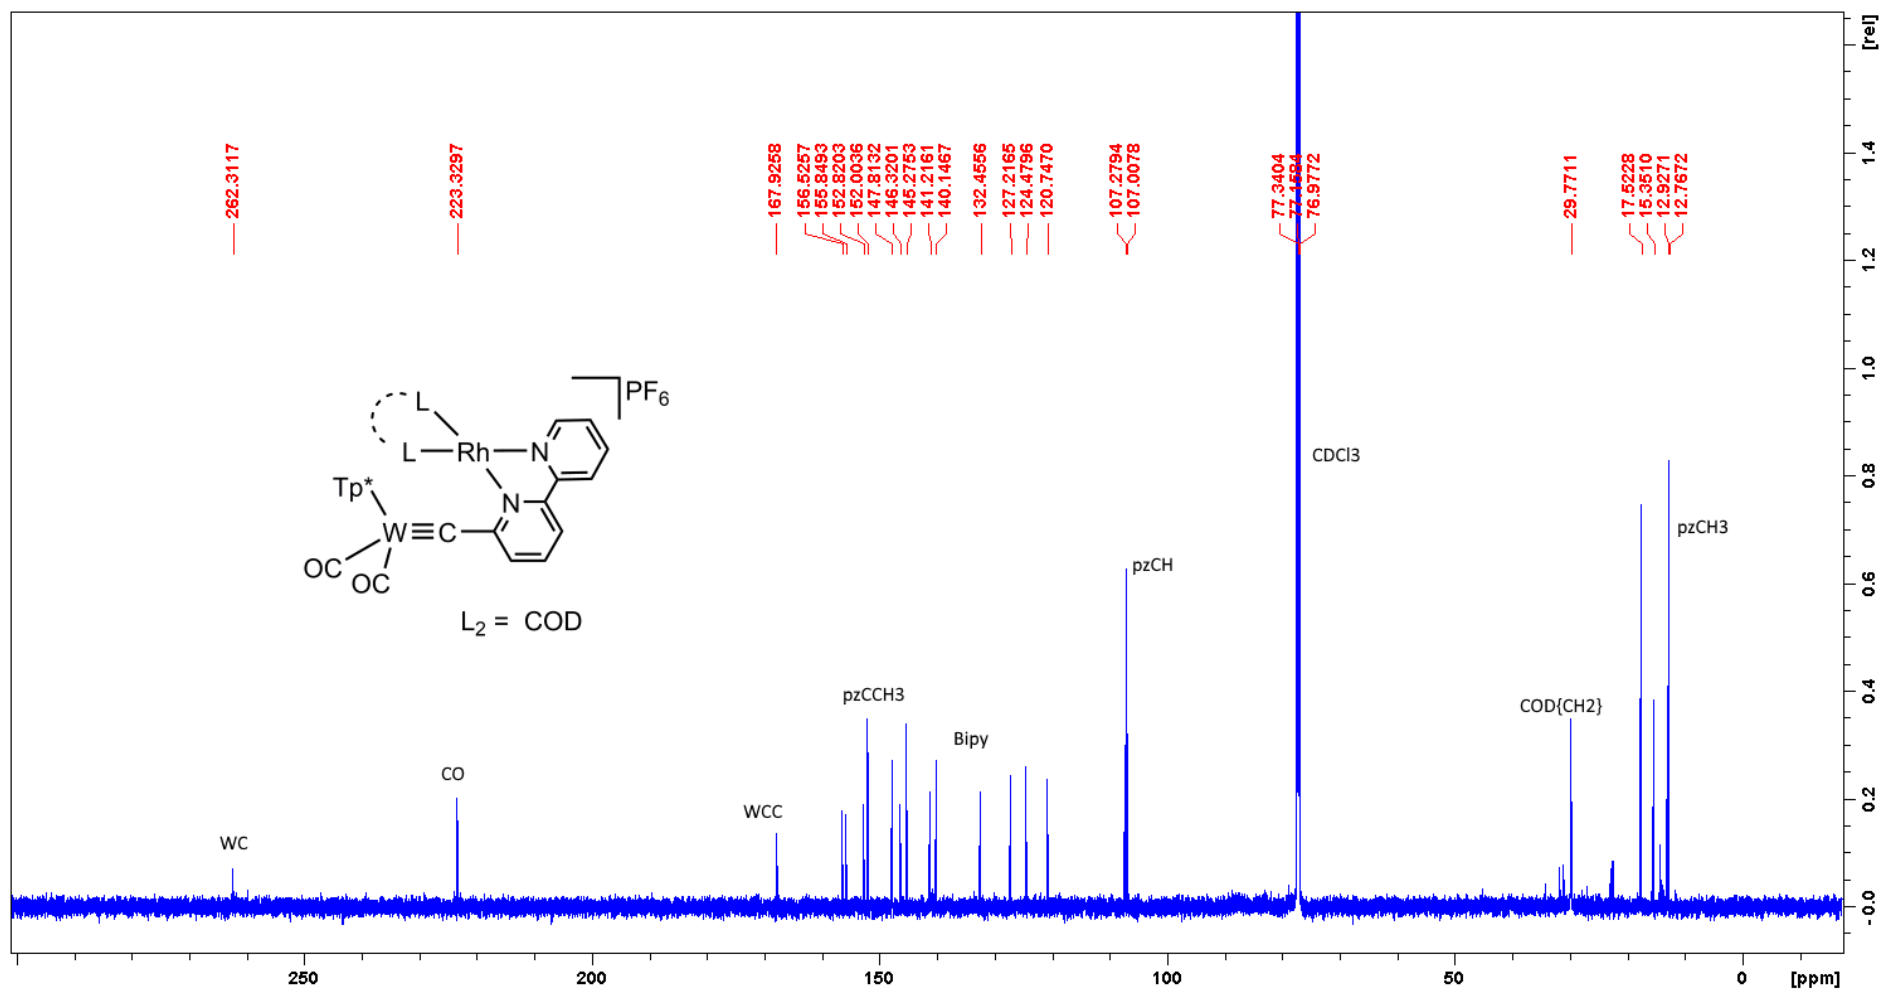

$^{13}\text{C}\{^1\text{H}\}$  NMR spectrum (176 MHz,  $\text{CDCl}_3$ , 25 °C) of  $[6\text{-}\{(\text{Tp}^*)(\text{CO})_2\text{W}\equiv\text{C}\}\text{bipy}\{\text{Rh}(\text{COD})\}]\text{PF}_6$  [**11**] $\text{PF}_6$ .

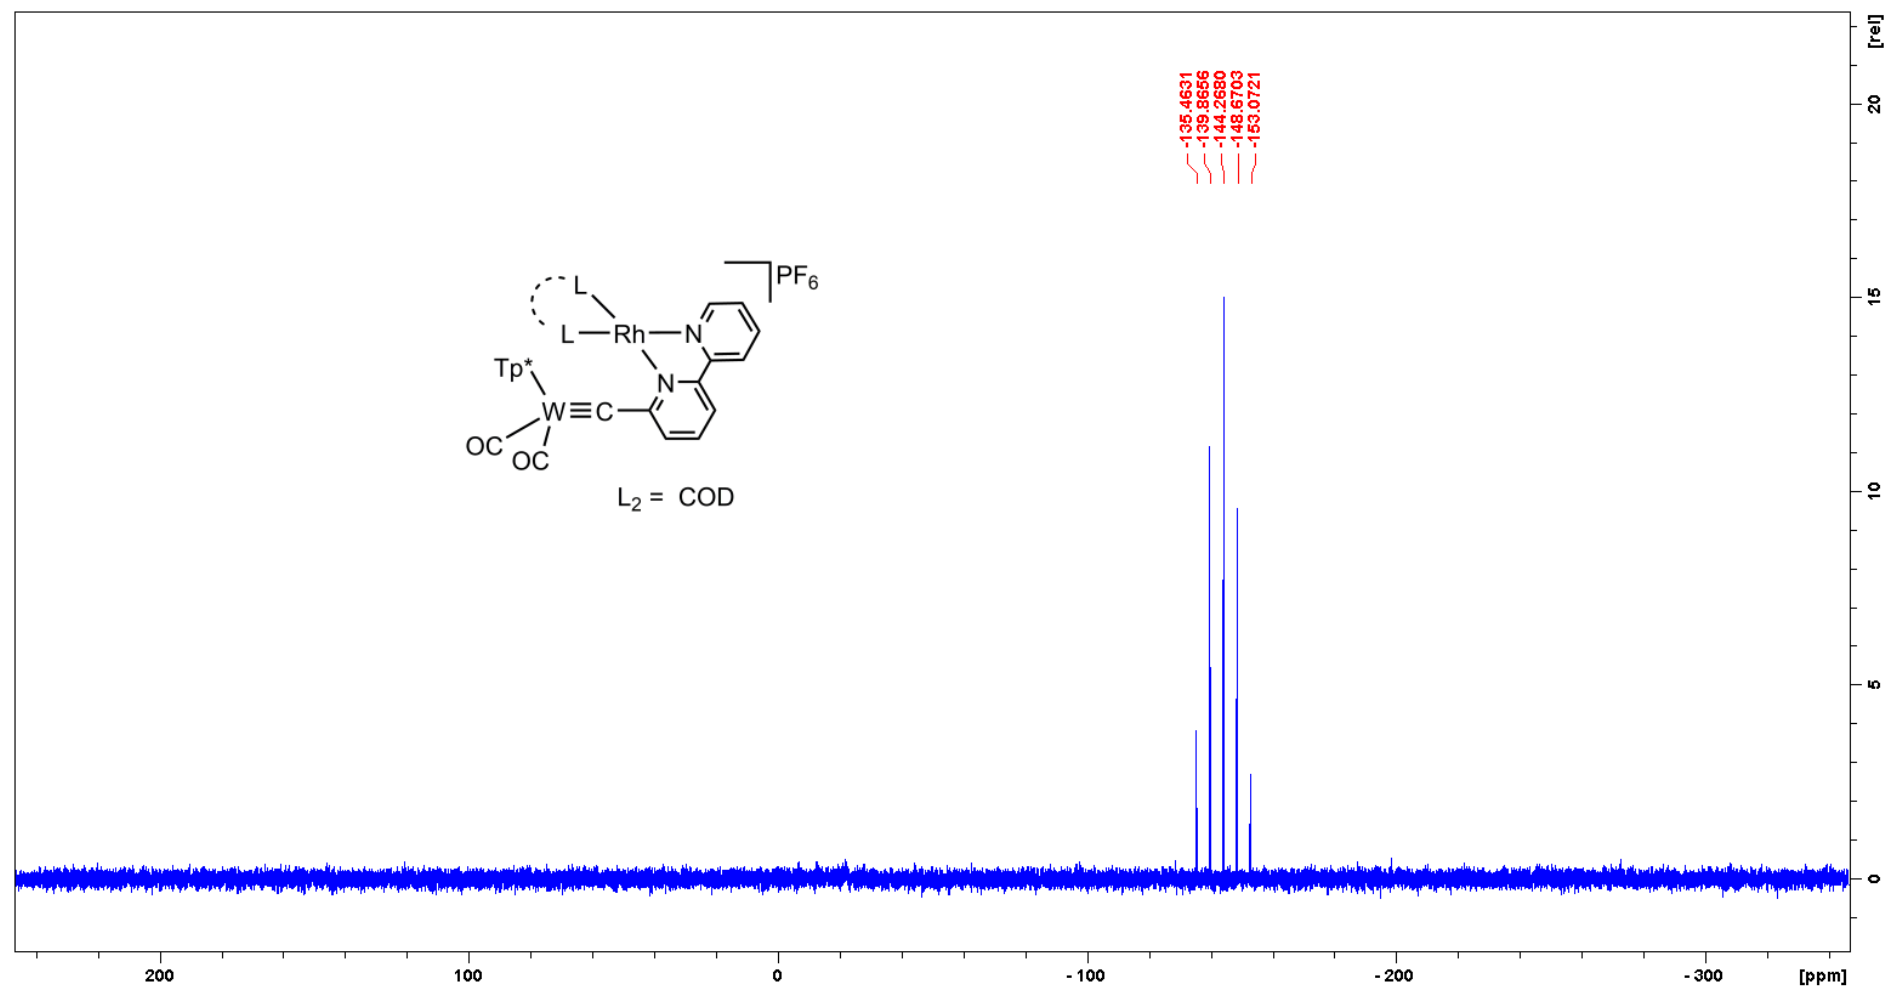

$^{31}\text{P}\{^1\text{H}\}$  NMR spectrum (162 MHz,  $\text{CDCl}_3$ , 25 °C) of  $[6-\{(\text{Tp}^*)(\text{CO})_2\text{W}\equiv\text{C}\}\text{bipy}\{\text{Rh}(\text{COD})\}]\text{PF}_6$  (**11**) $\text{PF}_6$ .

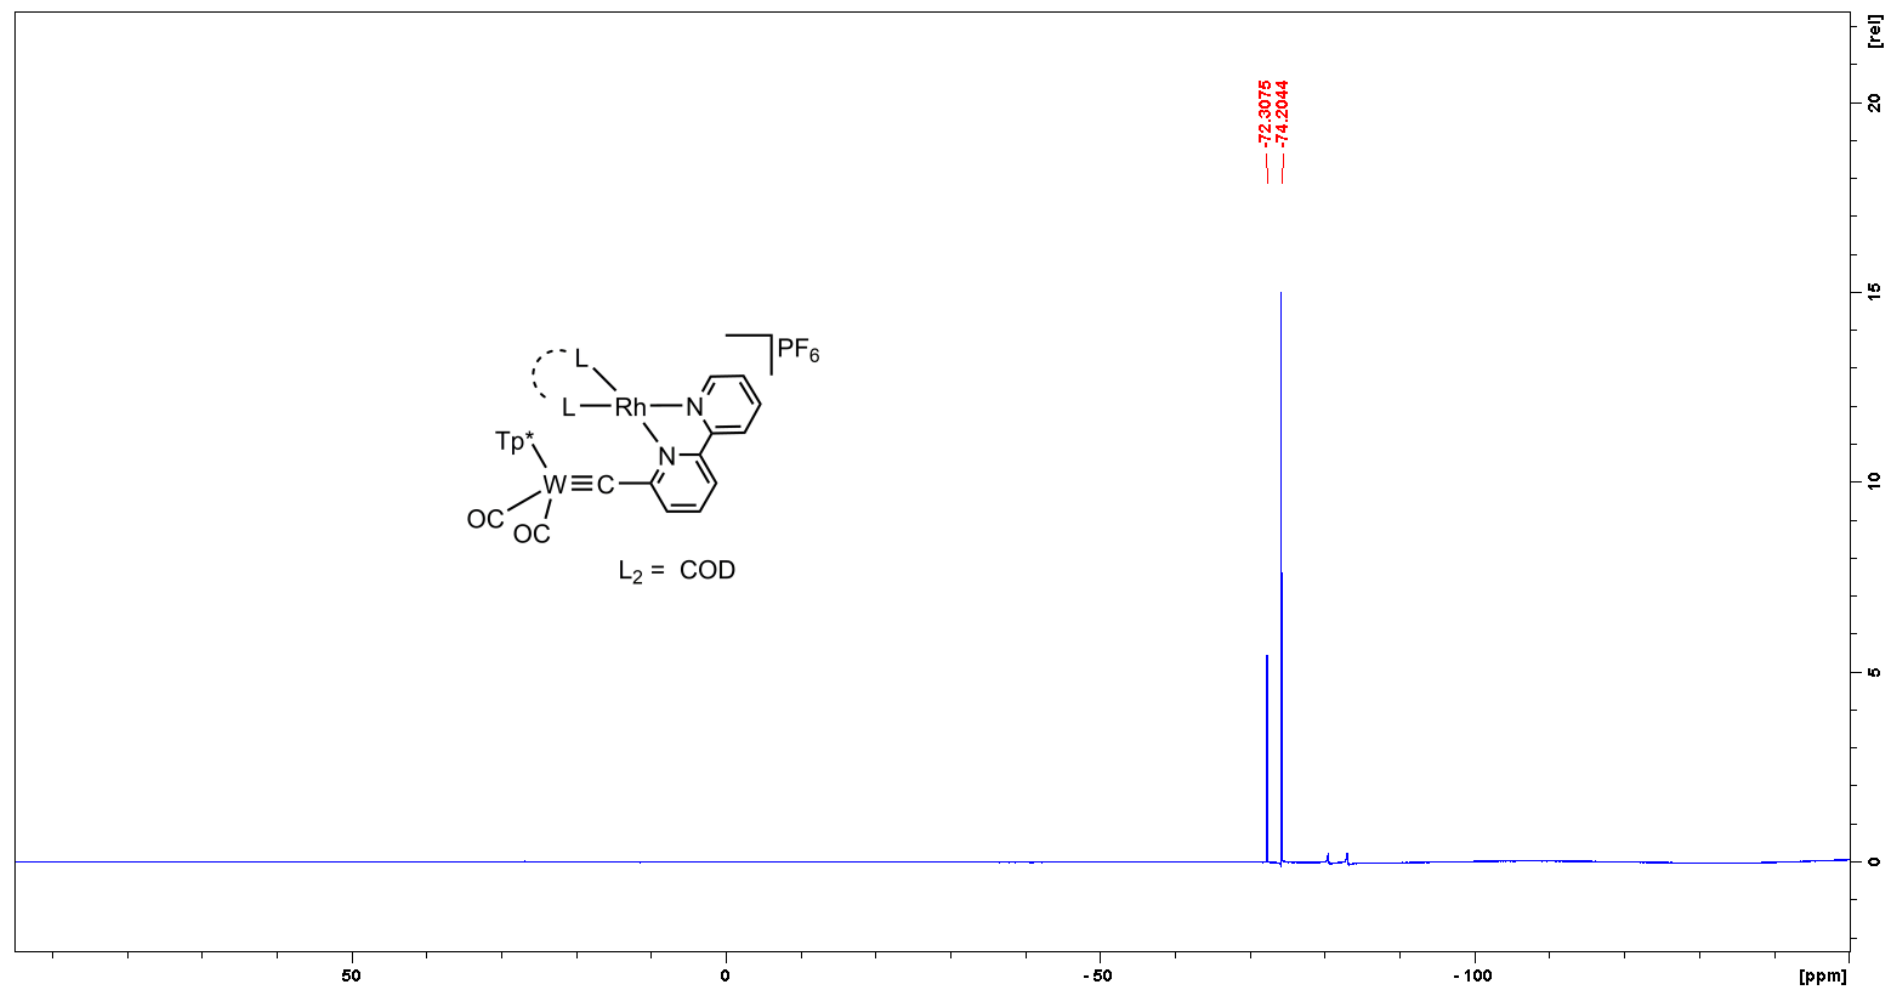

$^{19}\text{F}\{^1\text{H}\}$  NMR spectrum (376 MHz,  $\text{CDCl}_3$ , 25 °C) of  $[6\text{-}\{(\text{Tp}^*)(\text{CO})_2\text{W}\equiv\text{C}\}\text{bipy}\{\text{Rh}(\text{COD})\}]\text{PF}_6$  [**11**] $\text{PF}_6$ .

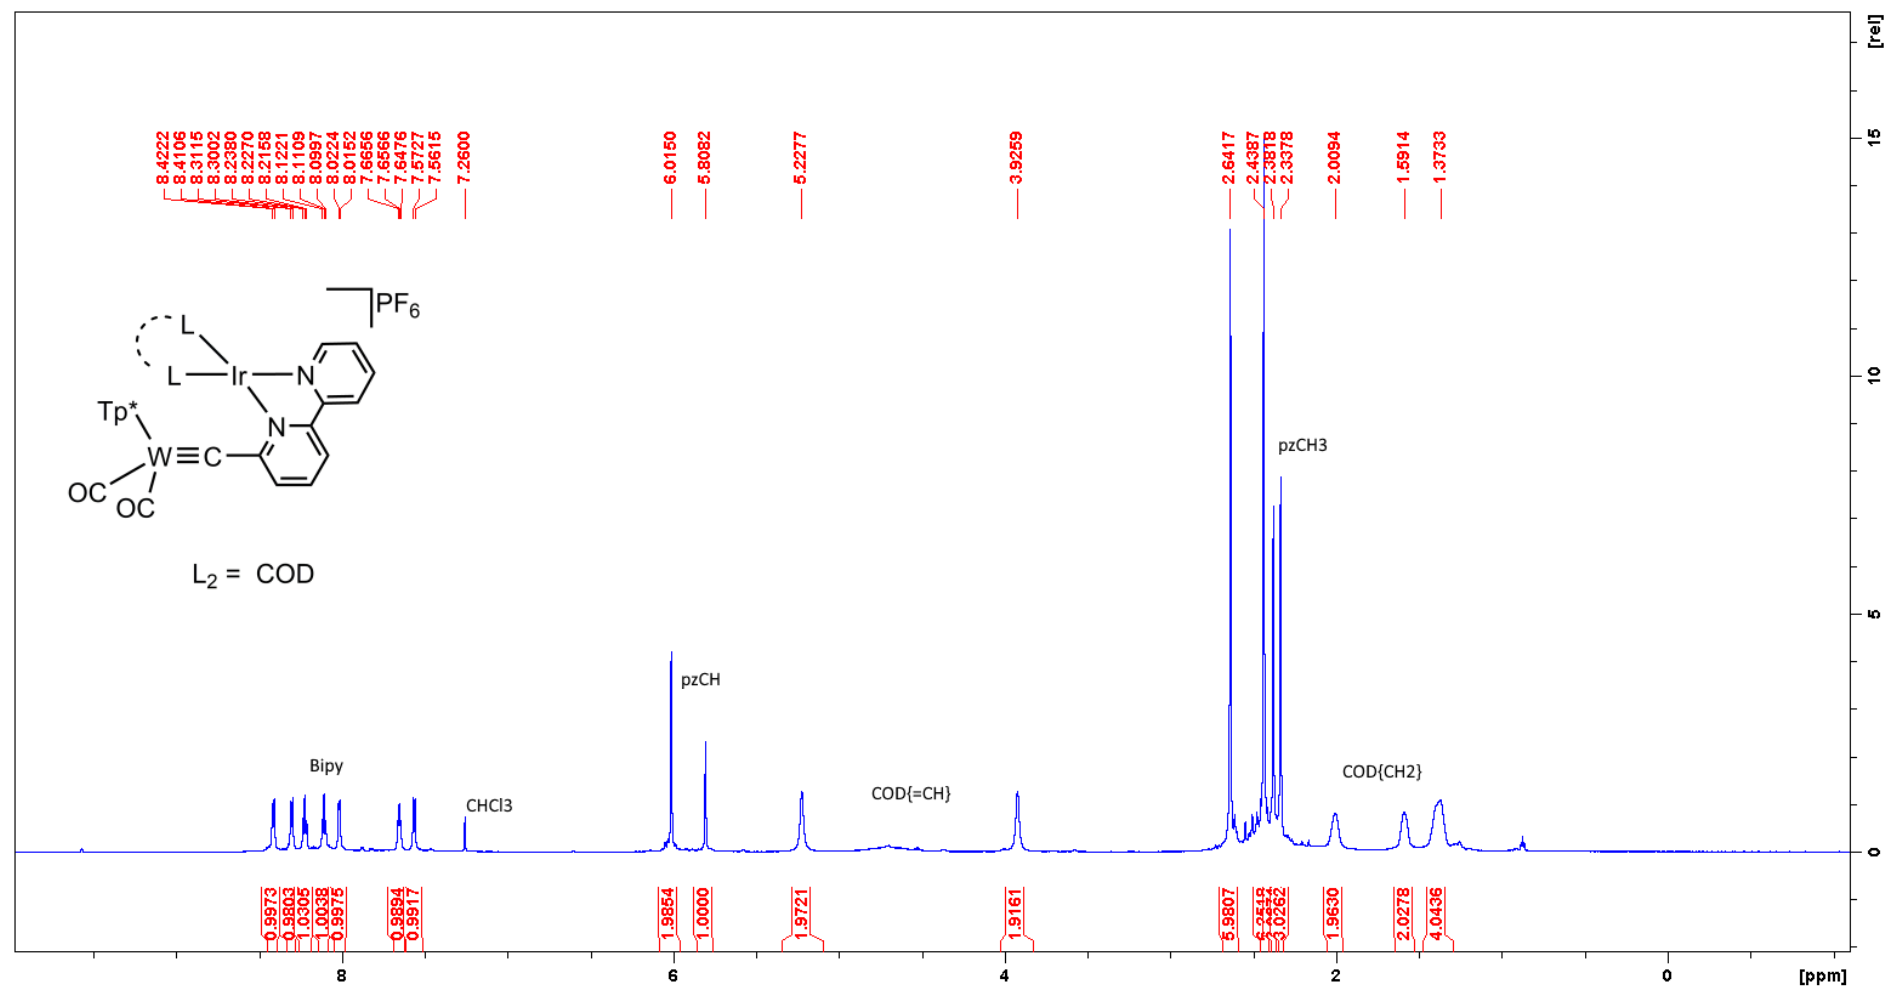

<sup>1</sup>H NMR spectrum (700 MHz, CDCl<sub>3</sub>, 25 °C) of [6-((Tp\*)(CO)<sub>2</sub>W≡C)bipy{Ir(COD)}}]PF<sub>6</sub> [**12**]PF<sub>6</sub>.



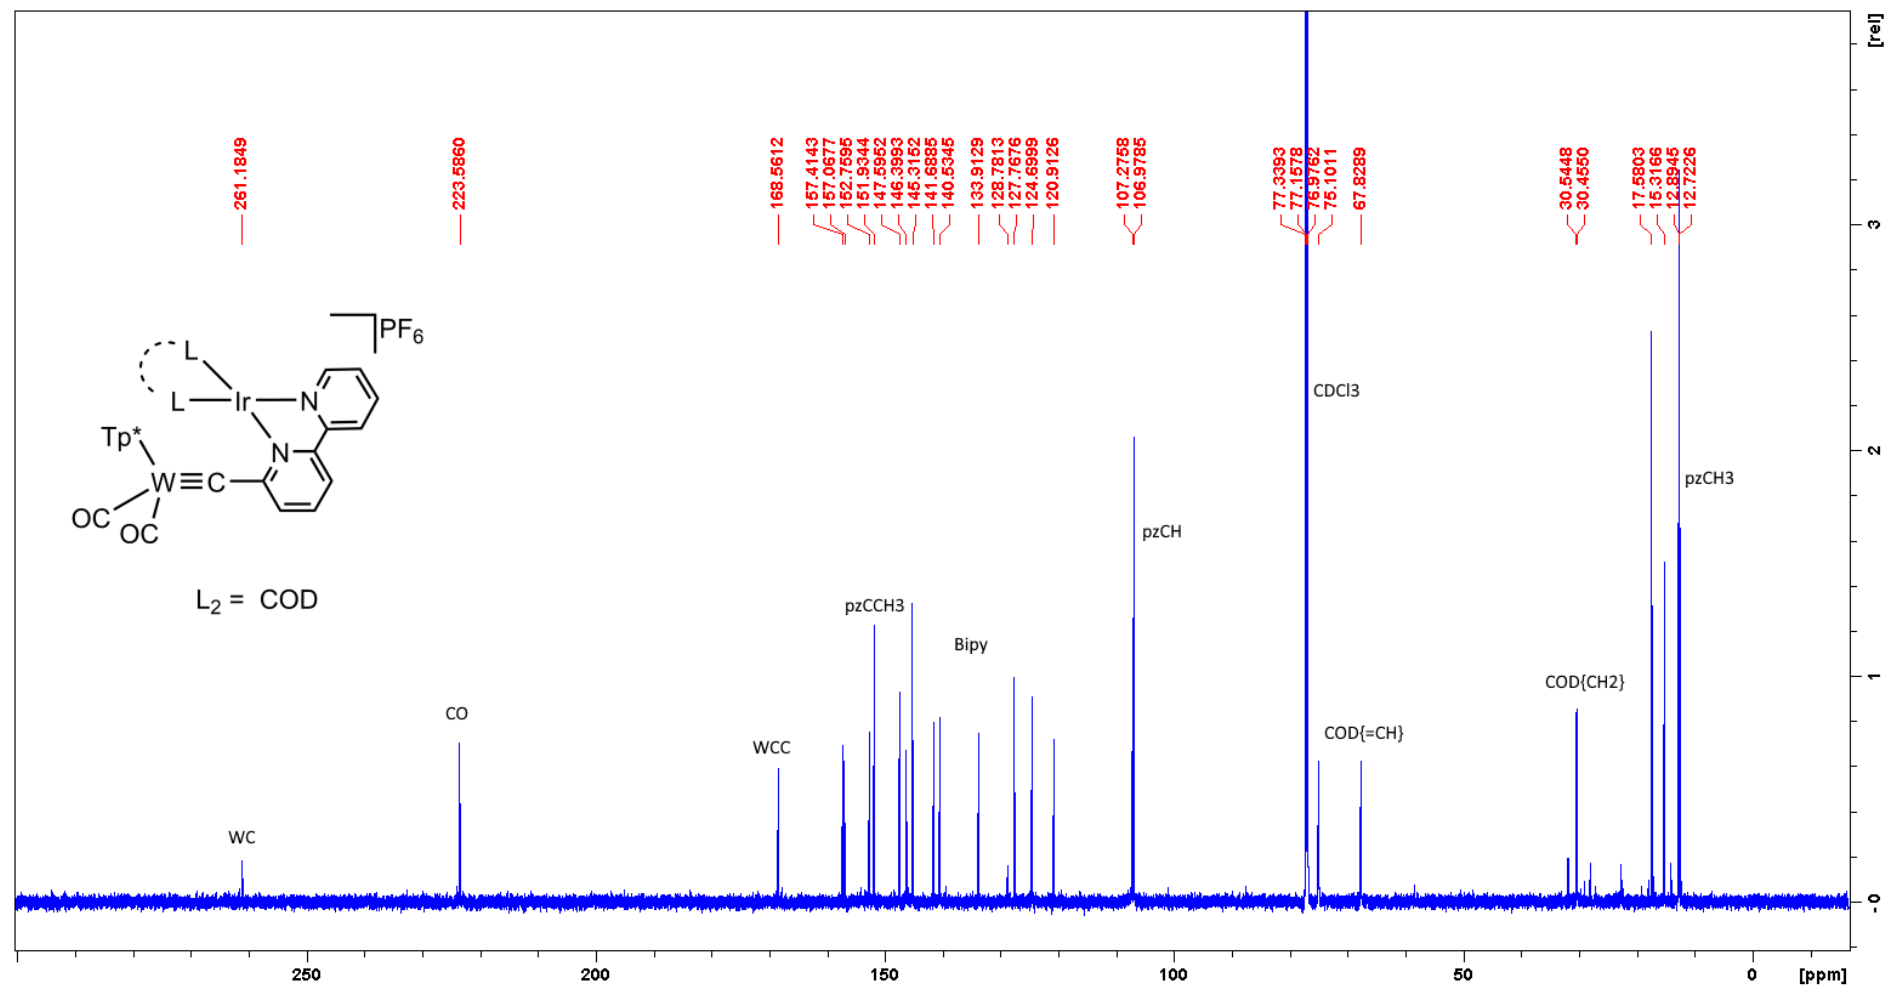

$^{13}\text{C}\{^1\text{H}\}$  NMR spectrum (176 MHz,  $\text{CDCl}_3$ , 25 °C) of  $[6-((\text{Tp}^*)(\text{CO})_2\text{W}\equiv\text{C})\text{bipy}\{\text{Ir}(\text{COD})\}]\text{PF}_6$  [12]PF<sub>6</sub>.

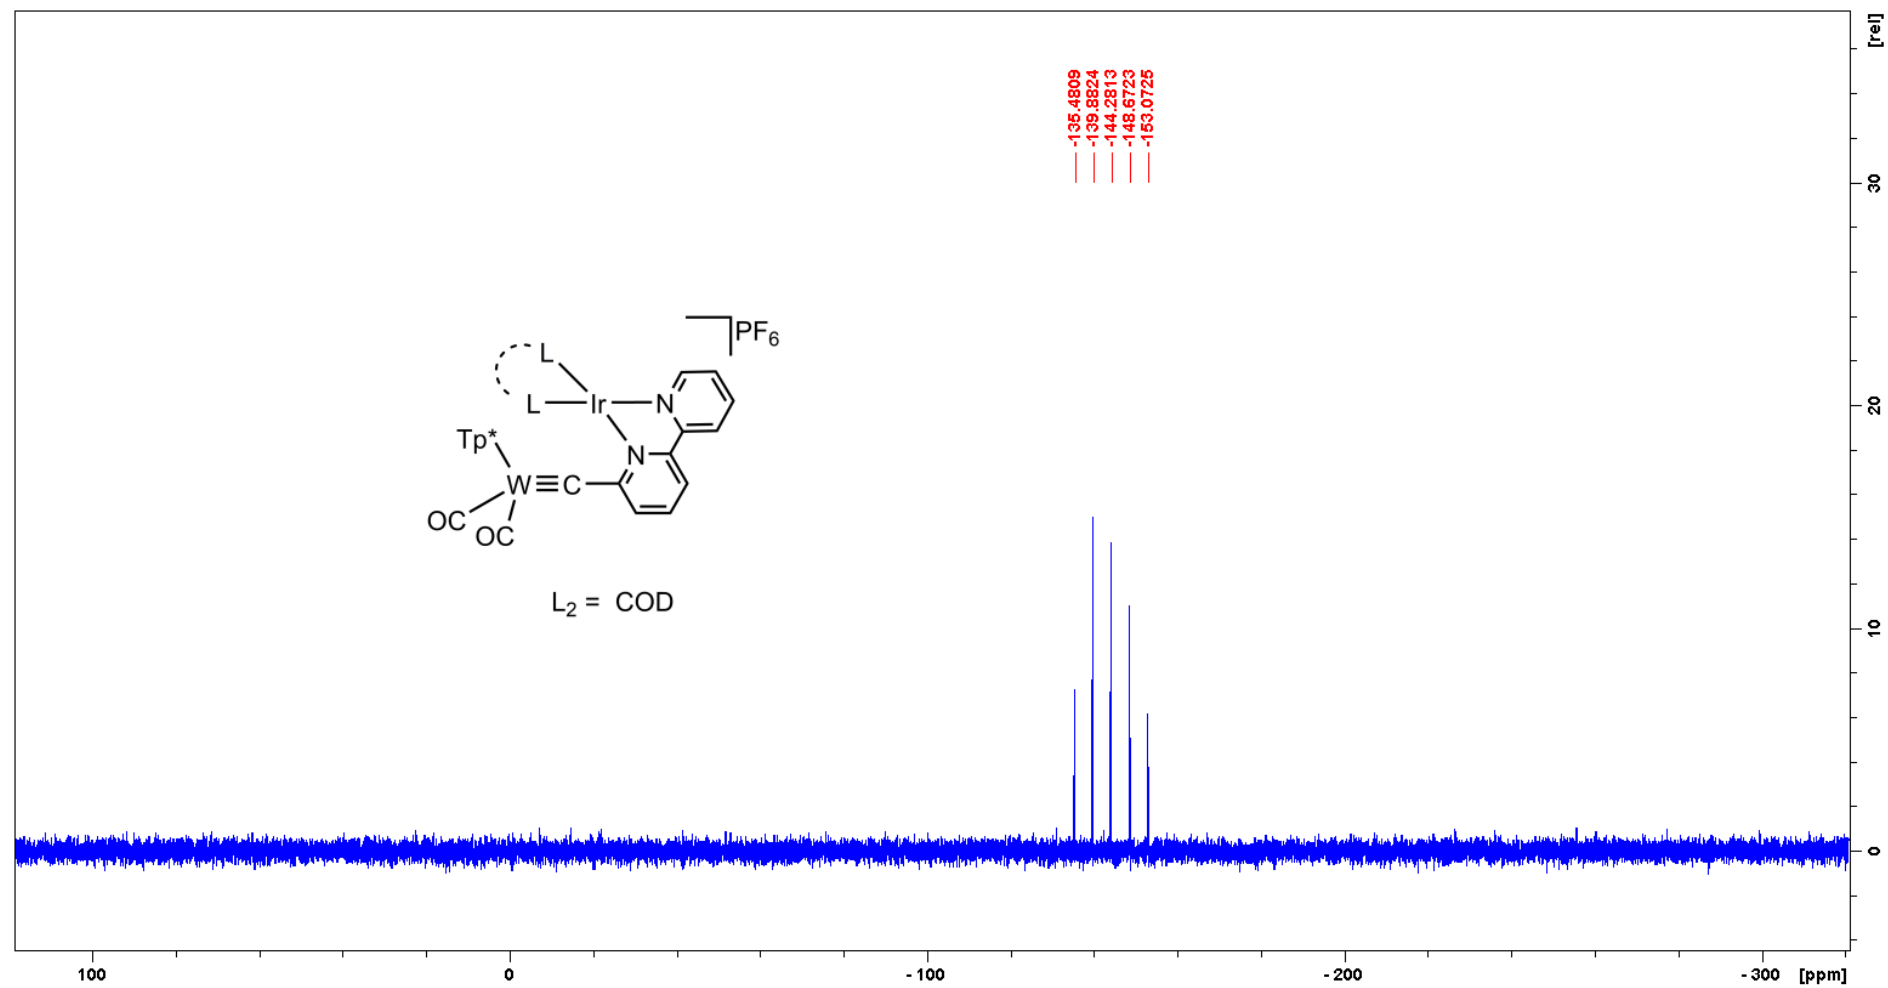

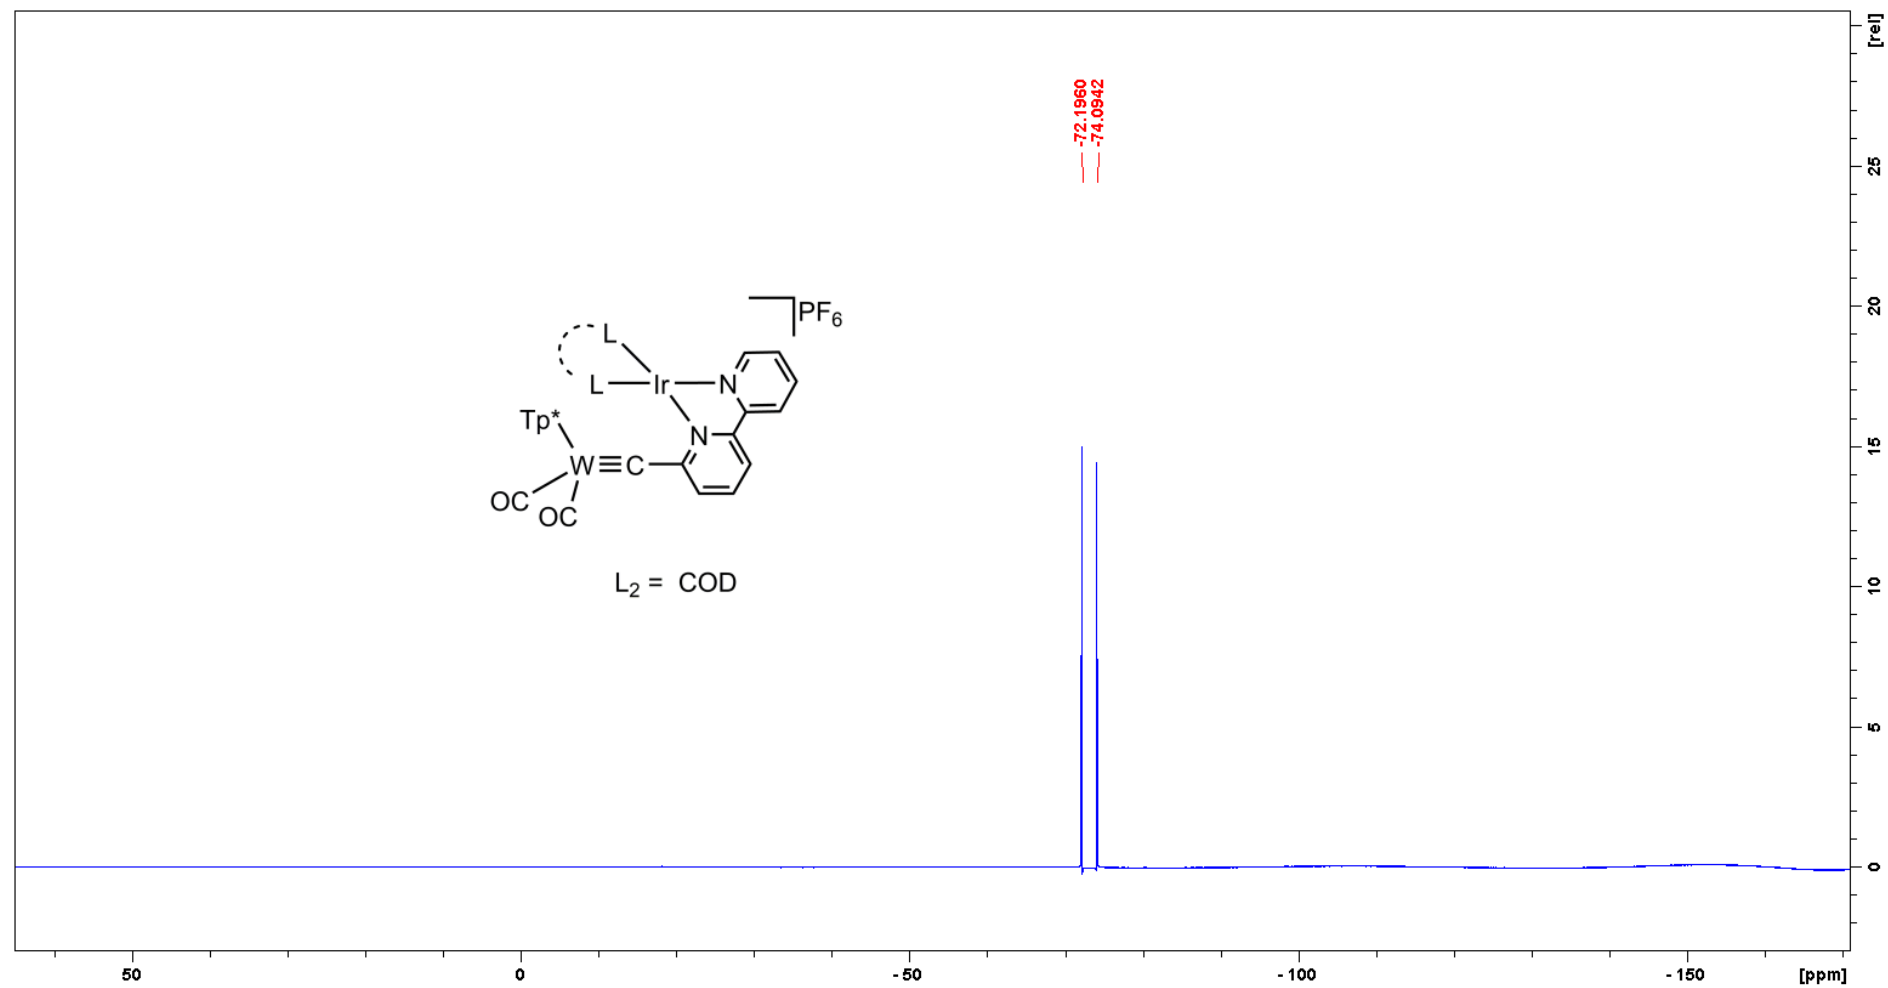

$^{19}\text{F}\{^1\text{H}\}$  NMR spectrum (376 MHz,  $\text{CDCl}_3$ , 25 °C) of  $[\text{6-}\{(\text{Tp}^*)(\text{CO})_2\text{W}\equiv\text{C}\}\text{bipy}\{\text{Ir}(\text{COD})\}]\text{PF}_6$  [**12**] $\text{PF}_6$ .

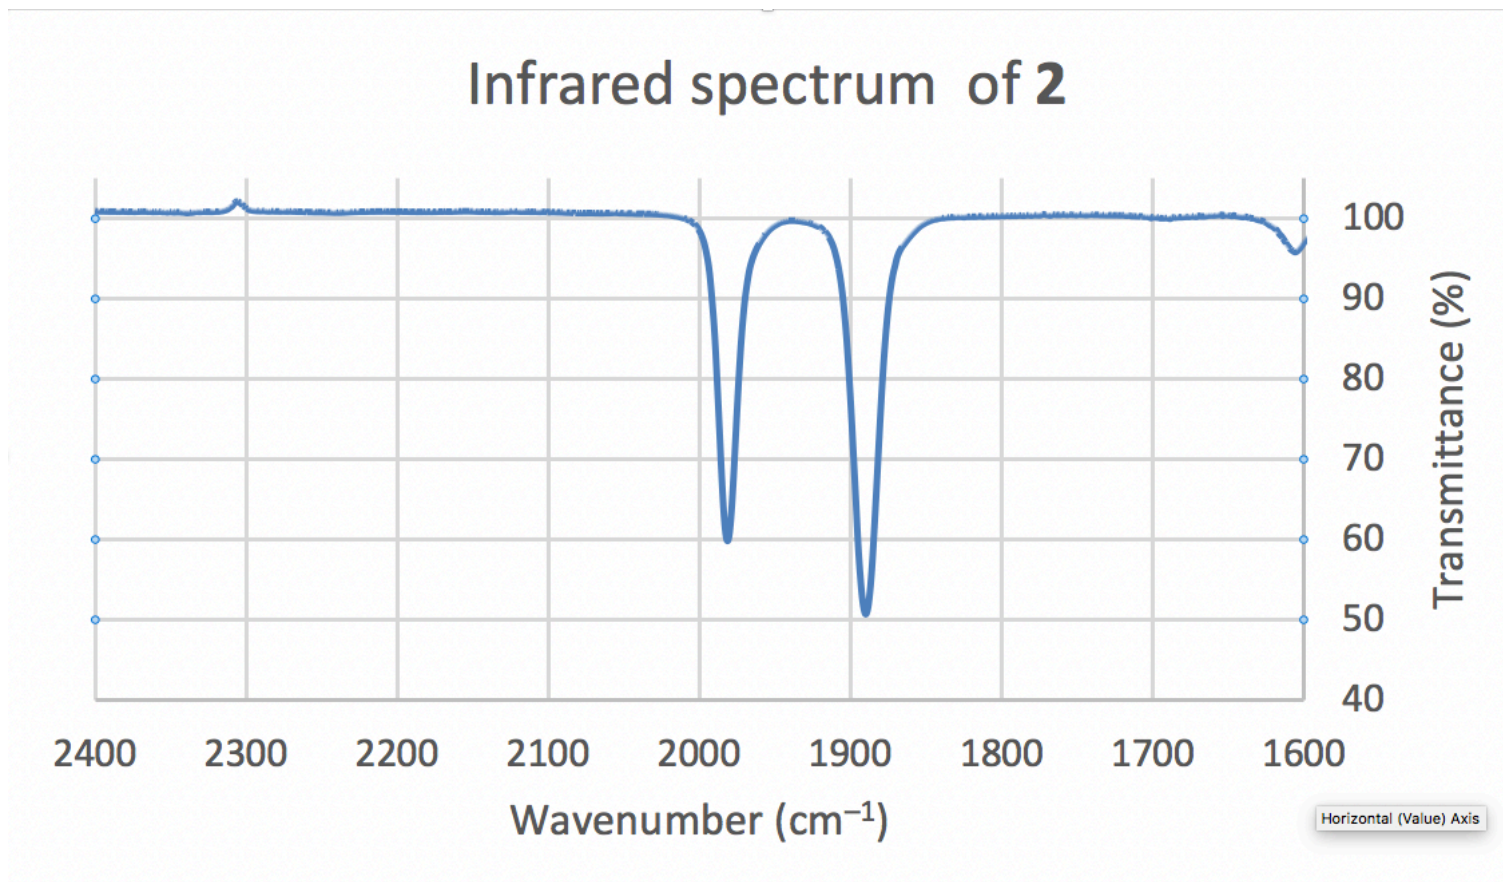

Infrared spectrum of **3**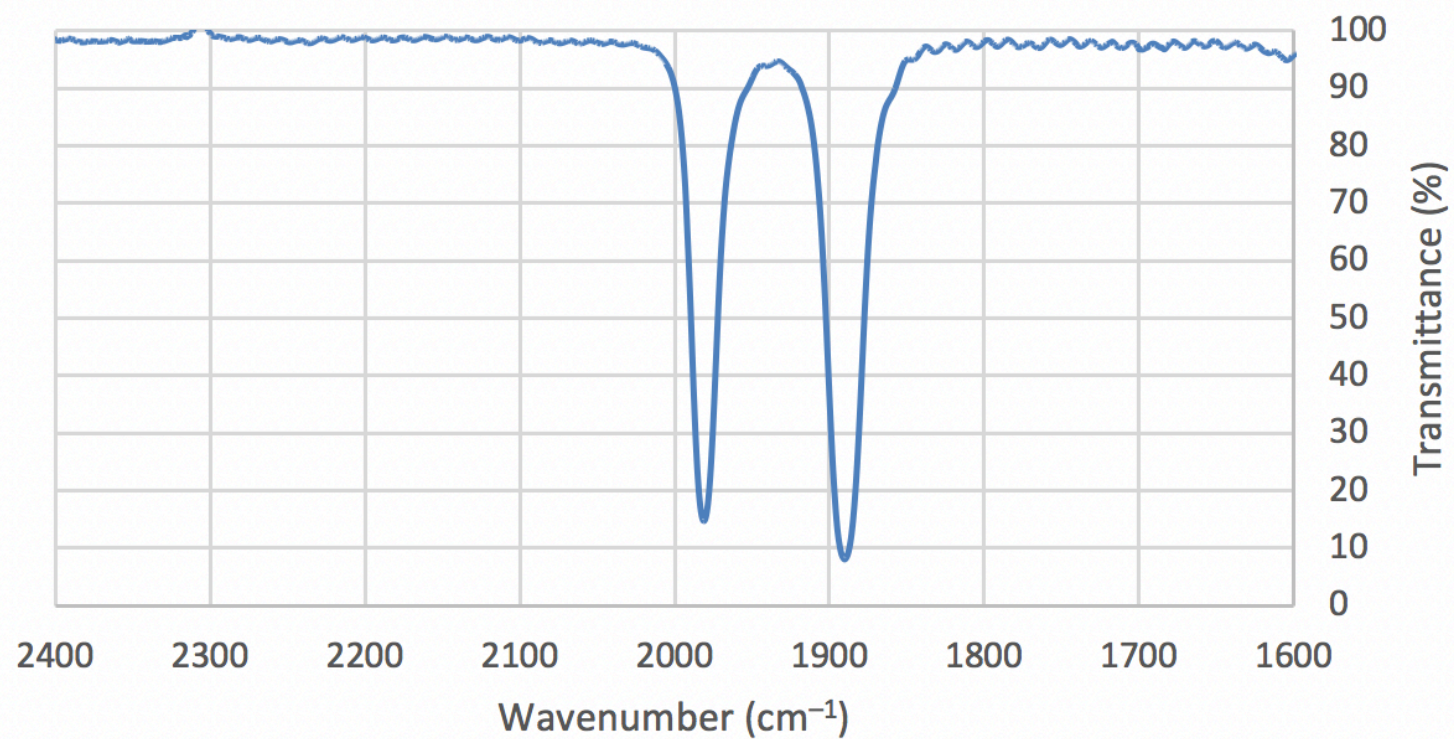

Infrared spectrum of **4**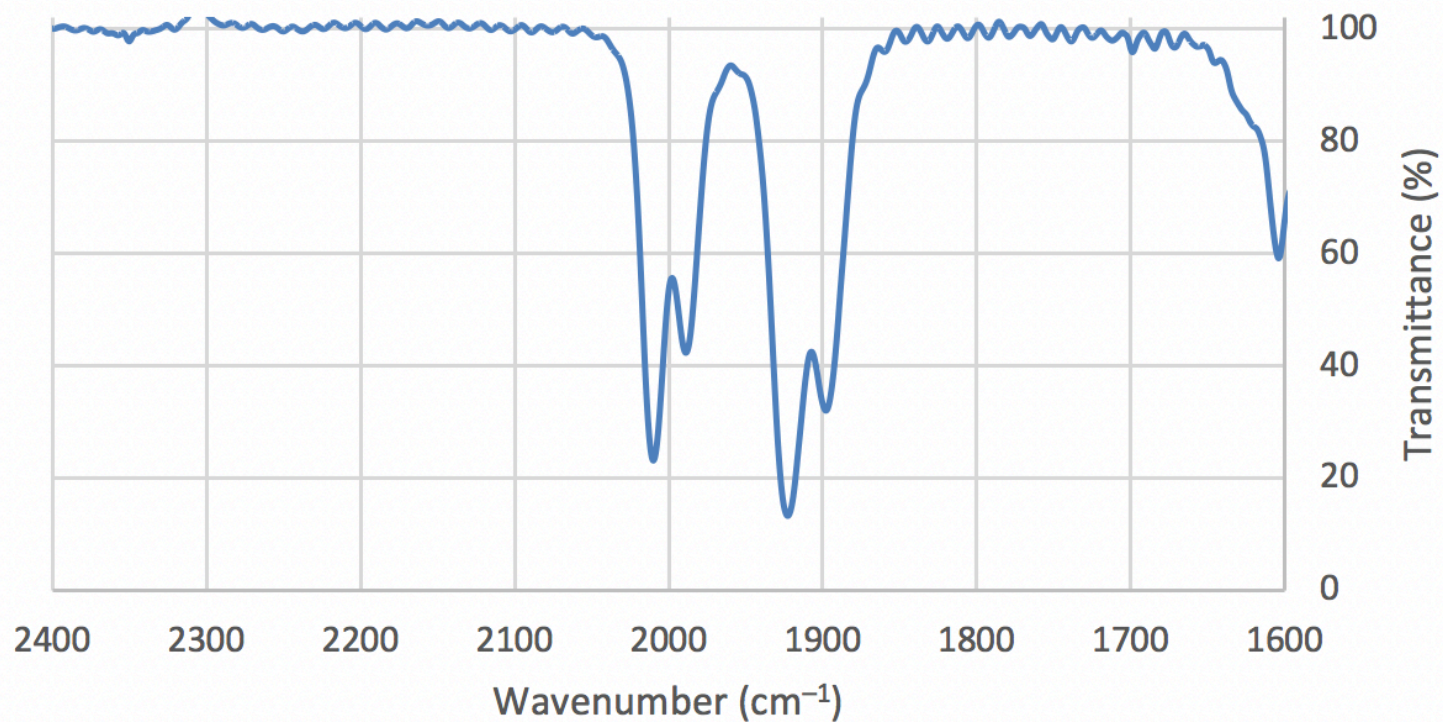

NB: The bands at 1989 and 1898  $\text{cm}^{-1}$  corresponding to **2** are only completely removed if the spectrum is run in the presence of excess  $\text{HBF}_4$ .

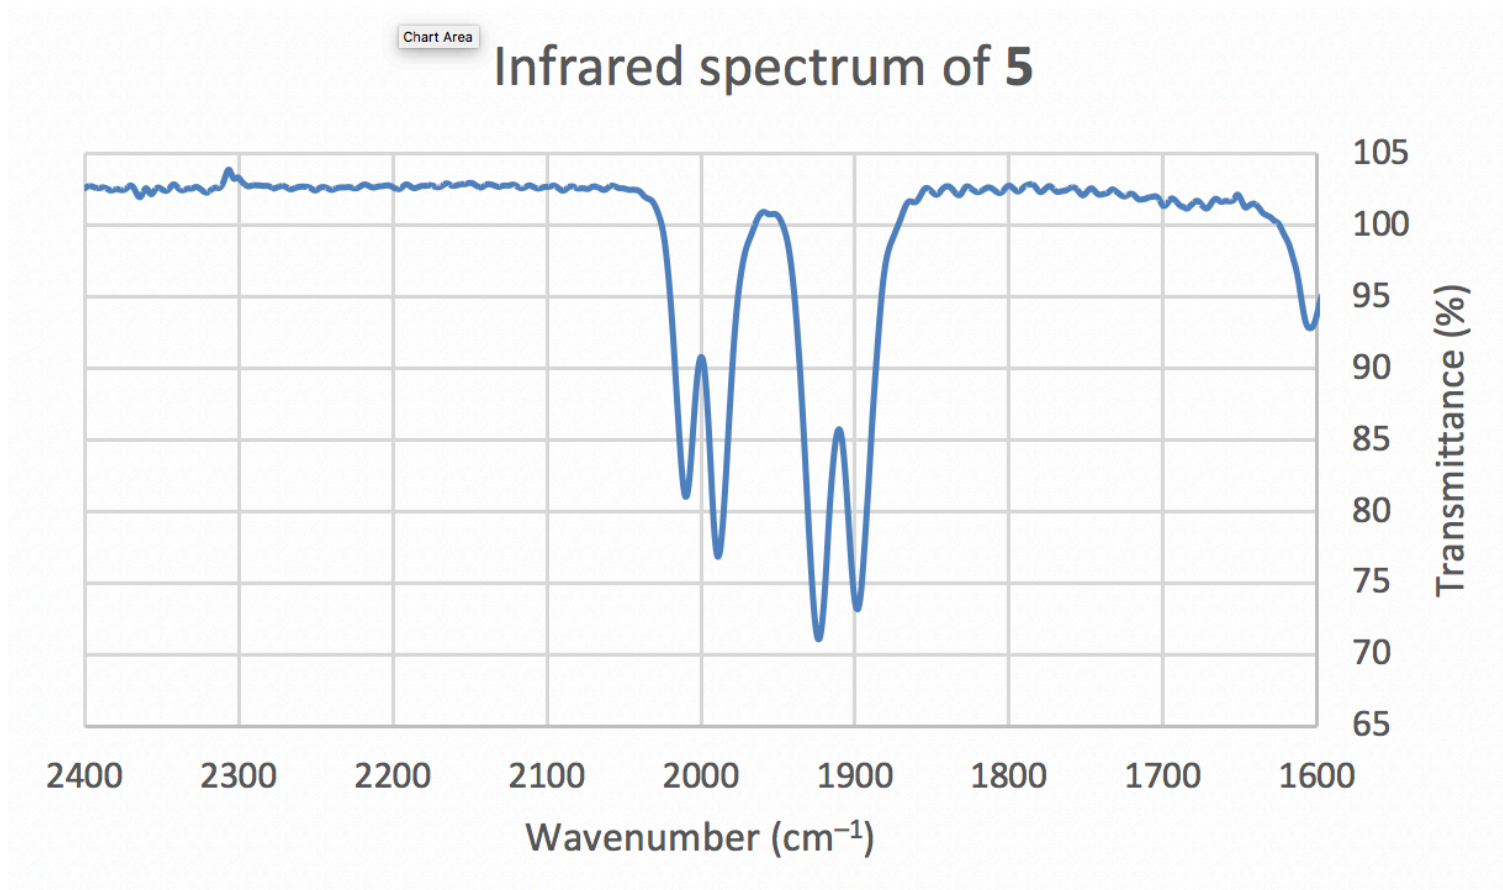

Infrared spectrum of **6**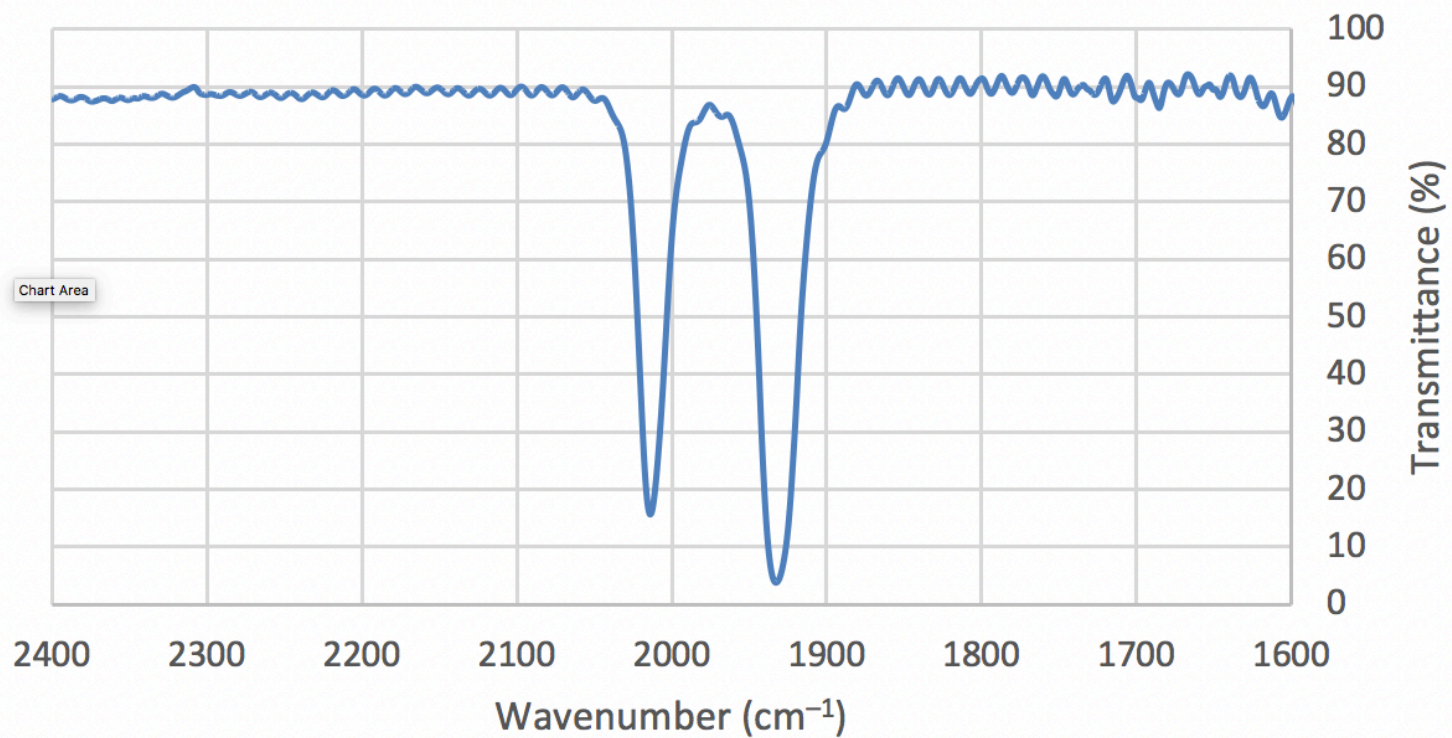



Infrared spectrum of **7**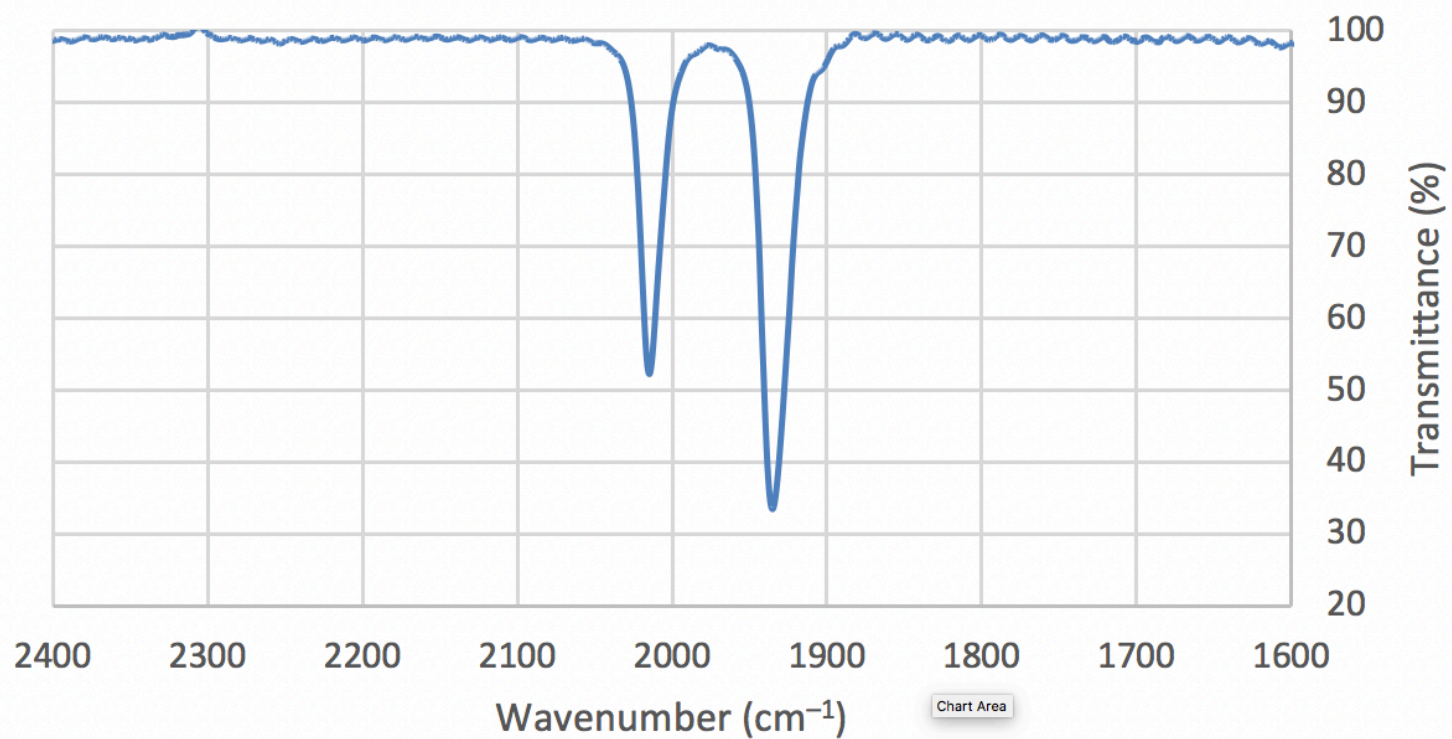

Infrared spectrum of **9**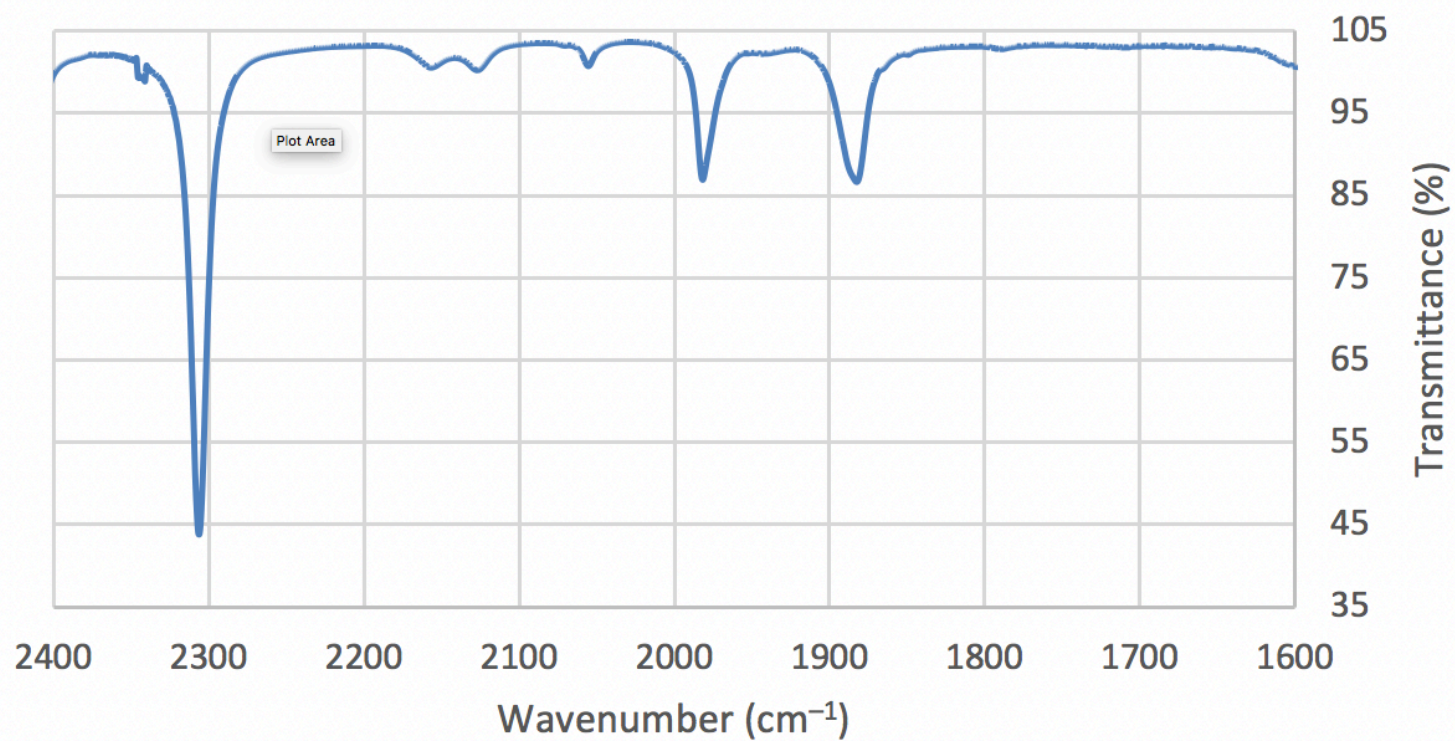

Infrared spectrum of **10**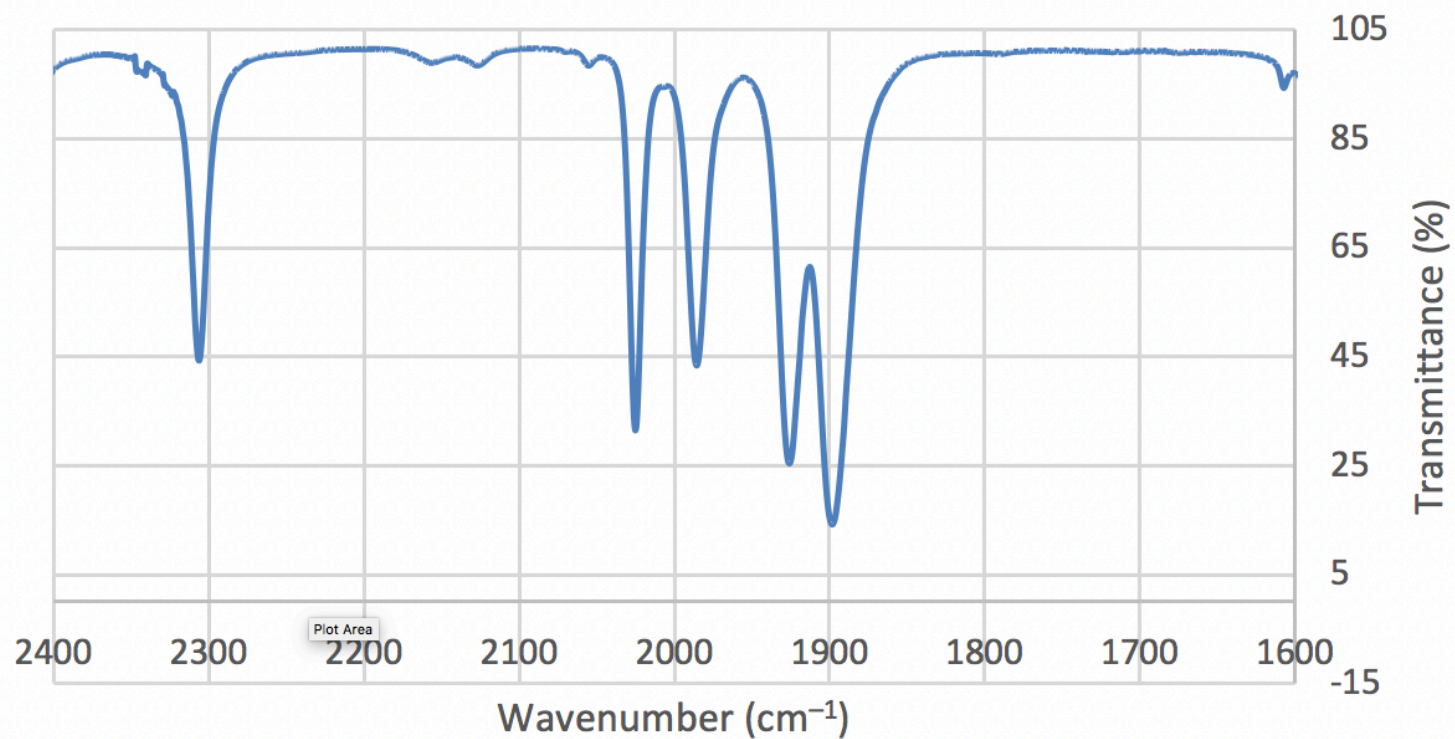

Infrared spectrum of **11**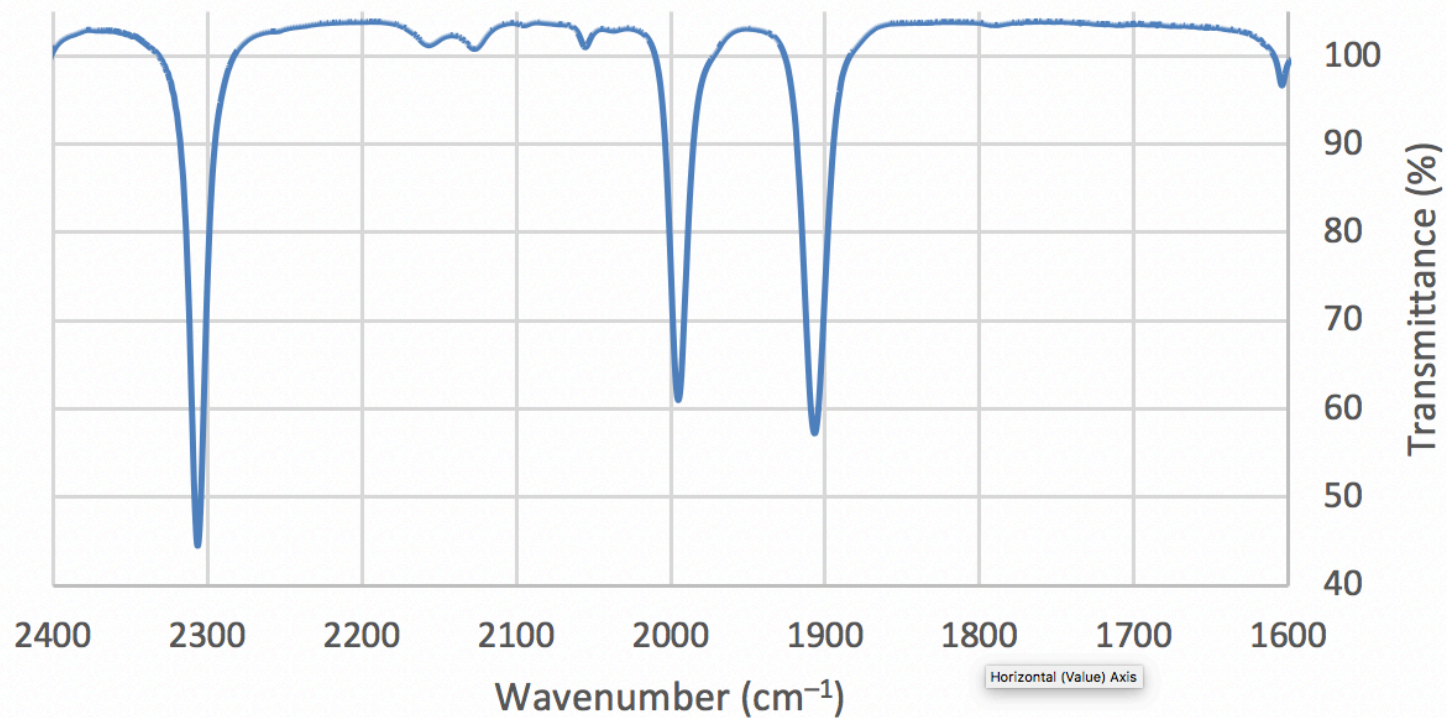

Infrared spectrum of **12**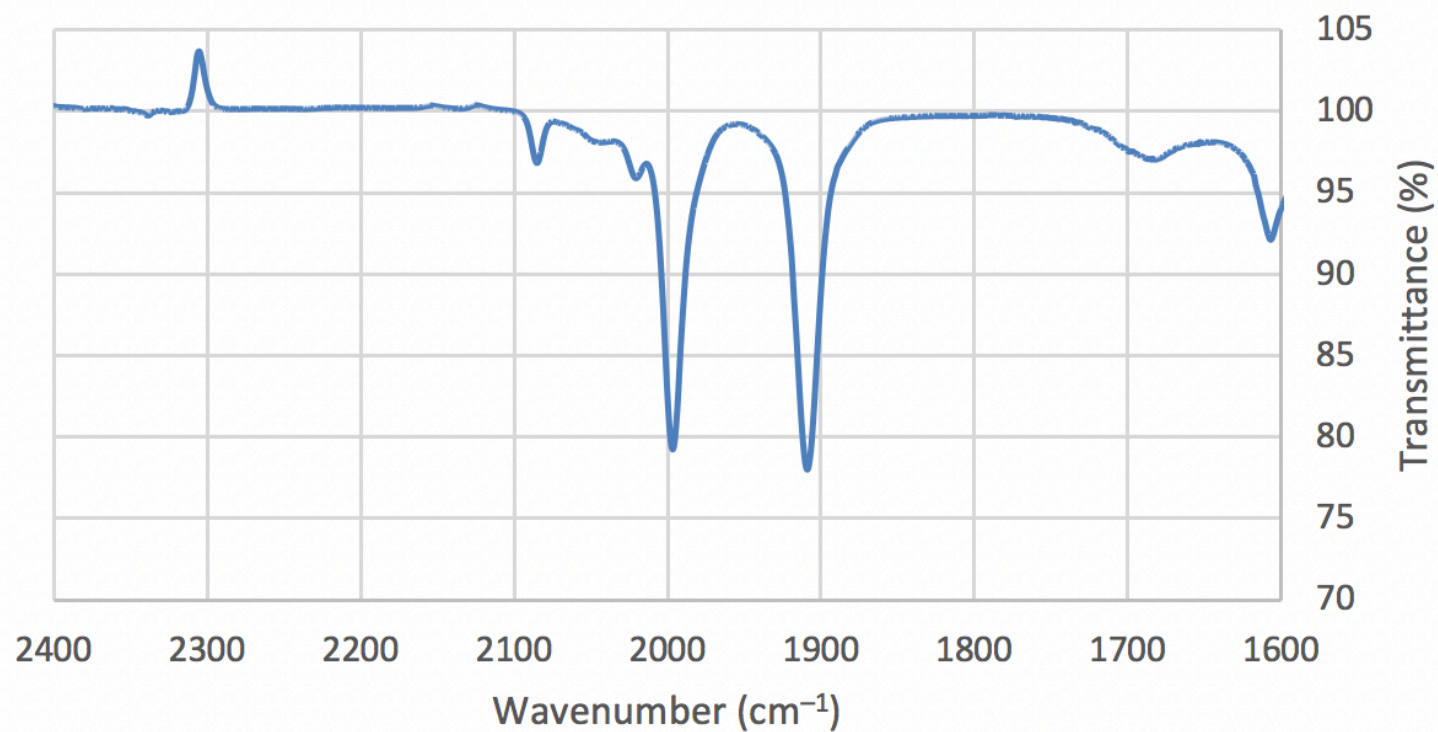

Supplement: c9dt04744a1.pdf [file c9dt04744a1.pdf]
